# Supplementary material for: A retrospective analysis of the peer review of more than 75,000 Marie Curie proposals between 2007 and 2018
Source: eLife. 2021 Jan 13;10:e59338. doi: 10.7554/eLife.59338 (PMC7806263; doi:10.7554/eLife.59338)
Supplement: Supplementary file 1. — For each proposal, the total score for the Consensus Report (CR) and the respective scores given by reviewers in their Individual Evaluation Report (IER) are reported. [file elife-59338-supp1.xlsx]

## Sheet: Dataset
Type of Action	Call Year	Panel	CR.Score	IER.1.Score	IER.2.Score	IER.3.Score	AVIER	diff_CR-AVIER	AD_index
IAPP	2007	CHE	89.5	90	89.4	92.5	90.6333	1.13333	1.24444
IAPP	2007	CHE	65.6	70.9	64.4	63.7	66.3333	0.733336	3.04444
IAPP	2007	CHE	75	78.7	70.6	66.5	71.9333	-3.06667	4.51111
IAPP	2007	CHE	72.7	54	67.7	82.4	68.0333	-4.66667	9.57778
IAPP	2007	ECOSOC	77.3	77.8	77.9	80.1	78.6	1.3	1
IAPP	2007	ECOSOC	77.3	72.3	73.1	87	77.4667	0.16667	6.35556
IAPP	2007	ECOSOC	37	53	42	34.5	43.1667	6.16667	6.55556
IAPP	2007	ECOSOC	77.2	62.8	80.4	77.9	73.7	-3.5	7.26667
IAPP	2007	ECOSOC	66.3	54.2	70.7	82.2	69.0333	2.73333	9.88889
IAPP	2007	ECOSOC	30.5	51	32	22	35	4.5	10.6667
IAPP	2007	ECOSOC	78.4	82.2	55.1	92	76.4333	-1.96667	14.2222
IAPP	2007	ECOSOC	70	78.9	41.5	70	63.4667	-6.53333	14.6444
IAPP	2007	ENG	58.1	58.8	57.5	57	57.7667	-0.333334	0.688889
IAPP	2007	ENG	93.8	95.6	92.5	93	93.7	-0.1	1.26667
IAPP	2007	ENG	88.8	90	88	84.6	87.5333	-1.26667	1.95556
IAPP	2007	ENG	82.9	80.8	87	82.2	83.3333	0.433336	2.44444
IAPP	2007	ENG	78.9	74.8	74.5	80.4	76.5667	-2.33333	2.55556
IAPP	2007	ENG	86.3	88.3	82.2	87.8	86.1	-0.2	2.6
IAPP	2007	ENG	65.9	66.7	76.5	71.8	71.6667	5.76666	3.31111
IAPP	2007	ENG	49.8	55.5	48.5	45	49.6667	-0.133332	3.88889
IAPP	2007	ENG	89	95.5	87.4	84.9	89.2667	0.26667	4.15556
IAPP	2007	ENG	82.8	85.9	88.2	77.3	83.8	1	4.33333
IAPP	2007	ENG	45.8	44.9	55.6	43.5	48	2.2	5.06667
IAPP	2007	ENG	81.8	77.8	81	91.5	83.4333	1.63333	5.37778
IAPP	2007	ENG	66	57.8	71.1	74.3	67.7333	1.73333	6.62222
IAPP	2007	ENG	82.7	89.9	86.4	73.2	83.1667	0.466664	6.64444
IAPP	2007	ENG	84	91.9	88	73.1	84.3333	0.333336	7.48889
IAPP	2007	ENG	77.6	76	88.6	66.6	77.0667	-0.533334	7.68889
IAPP	2007	ENG	85.5	70.6	80.5	95	82.0333	-3.46667	8.64444
IAPP	2007	ENG	56.7	52.5	72.5	53	59.3333	2.63333	8.77778
IAPP	2007	ENG	63.8	60.1	80.8	59.5	66.8	3	9.33333
IAPP	2007	ENG	77	82.5	60	83.2	75.2333	-1.76667	10.1556
IAPP	2007	ENG	59.9	66.6	67.5	44.1	59.4	-0.5	10.2
IAPP	2007	ENG	72.9	73.4	54	80.7	69.3667	-3.53333	10.2444
IAPP	2007	ENG	60.3	53.6	78.1	50	60.5667	0.266666	11.6889
IAPP	2007	ENG	73.7	75.8	86	54.4	72.0667	-1.63333	11.7778
IAPP	2007	ENG	57	51	44.5	76.3	57.2667	0.266666	12.6889
IAPP	2007	ENG	73.4	64.5	92.7	63	73.4	0	12.8667
IAPP	2007	ENG	77.3	55.8	75.2	94.8	75.2667	-2.03333	13.0222
IAPP	2007	ENG	72	52	66	90	69.3333	-2.66666	13.7778
IAPP	2007	ENG	64.2	48	70	88.5	68.8333	4.63334	13.8889
IAPP	2007	ENG	60.2	40	66.3	80.6	62.3	2.1	14.8667
IAPP	2007	ENG	66.3	69.4	43.3	89.7	67.4667	1.16667	16.1111
IAPP	2007	ENG	48.7	20	61.5	51.5	44.3333	-4.36667	16.2222
IAPP	2007	ENV	97.5	90.1	92.7	96	92.9333	-4.56667	2.04444
IAPP	2007	ENV	75.5	77.5	78.9	88.1	81.5	6	4.4
IAPP	2007	ENV	70	69.4	83.1	73.8	75.4333	5.43333	5.11111
IAPP	2007	ENV	70.3	63	70.5	81.3	71.6	1.3	6.46667
IAPP	2007	ENV	86.5	93.7	80.5	77.8	84	-2.5	6.46667
IAPP	2007	ENV	59.1	60	53	72.3	61.7667	2.66667	7.02222
IAPP	2007	ENV	17.5	28.5	20	40.5	29.6667	12.1667	7.22222
IAPP	2007	ENV	71.7	83	60	74.1	72.3667	0.66667	8.24444
IAPP	2007	ENV	59.2	63.7	45.5	68.2	59.1333	-0.066665	9.08889
IAPP	2007	ENV	73.5	87	59.5	73.7	73.4	-0.1	9.26667
IAPP	2007	ENV	64	85.7	54.5	72.7	70.9667	6.96667	10.9778
IAPP	2007	ENV	72.7	53	83.2	78	71.4	-1.3	12.2667
IAPP	2007	ENV	63.7	54.5	54	85	64.5	0.8	13.6667
IAPP	2007	ENV	74.2	47.2	81.5	79.8	69.5	-4.7	14.8667
IAPP	2007	LIF	2.5	7.5	6.2	7.5	7.06667	4.56667	0.577778
IAPP	2007	LIF	85.7	88	86.3	84.8	86.3667	0.66667	1.08889
IAPP	2007	LIF	85.2	84.1	84	88.5	85.5333	0.33333	1.97778
IAPP	2007	LIF	86.6	87.3	83.9	89.7	86.9667	0.36667	2.04444
IAPP	2007	LIF	93	88.7	95.9	91.7	92.1	-0.9	2.53333
IAPP	2007	LIF	79.1	76.9	80.4	84.5	80.6	1.5	2.6
IAPP	2007	LIF	87.5	81.5	89	87.4	85.9667	-1.53333	2.97778
IAPP	2007	LIF	77.2	69.6	80	77.7	75.7667	-1.43333	4.11111
IAPP	2007	LIF	85.8	81.4	91	91.7	88.0333	2.23333	4.42222
IAPP	2007	LIF	89.1	93.7	81.9	91.4	89	-0.1	4.73333
IAPP	2007	LIF	69.8	62.6	74.5	72.7	69.9333	0.133334	4.88889
IAPP	2007	LIF	84.6	84.6	94.3	80.5	86.4667	1.86667	5.22222
IAPP	2007	LIF	81.5	83	90.4	74.7	82.7	1.2	5.33333
IAPP	2007	LIF	73.5	64.7	77.3	76.3	72.7667	-0.73333	5.37778
IAPP	2007	LIF	68	61.5	70.6	78.9	70.3333	2.33334	5.88889
IAPP	2007	LIF	75.8	65.3	78.5	79.9	74.5667	-1.23333	6.17778
IAPP	2007	LIF	79.6	78.4	93.7	79.3	83.8	4.2	6.6
IAPP	2007	LIF	66.8	78.2	58.4	69.8	68.8	2	6.93333
IAPP	2007	LIF	80.6	71.2	86.1	89	82.1	1.5	7.26667
IAPP	2007	LIF	85.8	89.7	87.3	72	83	-2.8	7.33333
IAPP	2007	LIF	71.2	86.7	66.5	72.5	75.2333	4.03333	7.64444
IAPP	2007	LIF	79.7	73.5	93.6	78.5	81.8667	2.16667	7.82222
IAPP	2007	LIF	72.2	58.8	73.2	84.5	72.1667	-0.033336	8.91111
IAPP	2007	LIF	79.2	80.1	65.3	92.7	79.3667	0.16667	9.37778
IAPP	2007	LIF	75.5	83.4	74	55.5	70.9667	-4.53333	10.3111
IAPP	2007	LIF	80.1	82.2	93.9	62.1	79.4	-0.7	11.5333
IAPP	2007	LIF	60.4	78.7	50	55.4	61.3667	0.966665	11.5556
IAPP	2007	LIF	59.9	82.1	53.5	57	64.2	4.3	11.9333
IAPP	2007	LIF	76.1	77.2	87.7	53.7	72.8667	-3.23333	12.7778
IAPP	2007	LIF	62.5	70.6	76.9	44.8	64.1	1.6	12.8667
IAPP	2007	LIF	81.7	60.5	92.7	88.9	80.7	-1	13.4667
IAPP	2007	LIF	17.8	42.5	40	10.5	31	13.2	13.6667
IAPP	2007	LIF	83.6	91.5	57.8	88.8	79.3667	-4.23333	14.3778
IAPP	2007	LIF	58.1	80.1	35.5	65.5	60.3667	2.26667	16.5778
IAPP	2007	LIF	70.2	8.5	83.1	77.4	56.3333	-13.8667	31.8889
IAPP	2007	MAT	78.5	94	77.6	55.6	75.7333	-2.76667	13.4222
IAPP	2007	PHY	80.9	81.5	82.9	78.4	80.9333	0.033334	1.68889
IAPP	2007	PHY	81.6	84.4	75	83.2	80.8667	-0.73333	3.91111
IAPP	2007	PHY	73.4	85.8	70.6	71.3	75.9	2.5	6.6
IAPP	2007	PHY	47.9	64.5	49.8	49	54.4333	6.53333	6.71111
IAPP	2007	PHY	84.4	84.5	70.3	91.9	82.2333	-2.16667	7.95556
IAPP	2007	PHY	87.7	89.8	67.4	88.6	81.9333	-5.76667	9.68889
IAPP	2007	PHY	73.6	54.4	82.2	80.1	72.2333	-1.36667	11.8889
IAPP	2007	PHY	65.7	92.1	28.3	80.7	67.0333	1.33333	25.8222
IEF	2007	CHE	44.1	57	58.2	0	38.4	-5.7	25.6
IEF	2007	CHE	51.2	33.5	70.7	54	52.7333	1.53333	12.8222
IEF	2007	CHE	75	89.7	66.1	53.4	69.7333	-5.26667	13.3111
IEF	2007	CHE	66.5	83	72.4	39	64.8	-1.7	17.2
IEF	2007	CHE	79.5	91.9	79.3	47.5	72.9	-6.6	16.9333
IEF	2007	CHE	68.4	78	66.3	53.5	65.9333	-2.46667	8.28889
IEF	2007	CHE	88.5	90.5	95.4	55.5	80.4667	-8.03333	16.6444
IEF	2007	CHE	75.7	92.1	71.4	63.8	75.7667	0.06667	10.8889
IEF	2007	CHE	69.4	94.3	63.5	53.5	70.4333	1.03333	15.9111
IEF	2007	CHE	70.3	76.2	76.9	57.4	70.1667	-0.133336	8.51111
IEF	2007	CHE	71.2	76.3	79.5	55.2	70.3333	-0.866664	10.0889
IEF	2007	CHE	70.5	70.8	92.6	52.5	71.9667	1.46667	13.7556
IEF	2007	CHE	67.3	67.4	70.9	66.5	68.2667	0.96667	1.75556
IEF	2007	CHE	60	34.5	82.8	57.2	58.1667	-1.83333	16.4222
IEF	2007	CHE	75.5	91.2	75.6	61.4	76.0667	0.566666	10.0889
IEF	2007	CHE	72.6	86.1	88.7	57.4	77.4	4.8	13.3333
IEF	2007	CHE	67.6	93	66.1	55	71.3667	3.76667	14.4222
IEF	2007	CHE	53.3	52.6	52	74.5	59.7	6.4	9.86667
IEF	2007	CHE	67.2	68.2	75.6	64.2	69.3333	2.13334	4.17778
IEF	2007	CHE	46.5	35.5	46	59.3	46.9333	0.433334	8.24444
IEF	2007	CHE	61.9	80.2	52.5	61.9	64.8667	2.96667	10.2222
IEF	2007	CHE	67.5	76.3	73.1	71	73.4667	5.96667	1.88889
IEF	2007	CHE	72.8	88.1	68	58.1	71.4	-1.4	11.1333
IEF	2007	CHE	85.8	85.6	94.2	61.5	80.4333	-5.36667	12.6222
IEF	2007	CHE	73.7	65.8	83.3	68.4	72.5	-1.2	7.2
IEF	2007	CHE	76.7	73.3	87.2	68.6	76.3667	-0.33333	7.22222
IEF	2007	CHE	80.4	75.7	93.5	69.8	79.6667	-0.733336	9.22222
IEF	2007	CHE	81.6	82.2	80.4	74.2	78.9333	-2.66667	3.15556
IEF	2007	CHE	77.3	71.3	87.6	73.9	77.6	0.3	6.66667
IEF	2007	CHE	81.6	82.1	89.3	77	82.8	1.2	4.33333
IEF	2007	CHE	79.7	85.8	76	75.5	79.1	-0.6	4.46667
IEF	2007	CHE	74.6	72.1	95	69.5	78.8667	4.26667	10.7556
IEF	2007	CHE	83.2	93.2	85.5	72	83.5667	0.366666	7.71111
IEF	2007	CHE	83.5	73.5	86.9	83.5	81.3	-2.2	5.2
IEF	2007	CHE	66	84	57.8	65.5	69.1	3.1	9.93333
IEF	2007	CHE	72.6	69	88.7	63	73.5667	0.966666	10.0889
IEF	2007	CHE	71.9	73	80.7	54.7	69.4667	-2.43333	9.84444
IEF	2007	CHE	72.8	83.7	67.1	57.7	69.5	-3.3	9.46667
IEF	2007	CHE	85.2	96.5	81.4	67.1	81.6667	-3.53334	9.88889
IEF	2007	CHE	78.5	84.4	81.3	67.4	77.7	-0.8	6.86667
IEF	2007	CHE	88.9	93.5	90.8	62.5	82.2667	-6.63333	13.1778
IEF	2007	CHE	83	84.6	84.2	71.2	80	-3	5.86667
IEF	2007	CHE	70.4	45.5	89.1	74.2	69.6	-0.8	16.0667
IEF	2007	CHE	71.9	93.3	65.1	72	76.8	4.9	11
IEF	2007	CHE	76.5	70	88.5	73.8	77.4333	0.933334	7.37778
IEF	2007	CHE	70	38.5	76.3	78.5	64.4333	-5.56667	17.2889
IEF	2007	CHE	79	76.9	81.2	81.8	79.9667	0.96667	2.04444
IEF	2007	CHE	78.3	79.6	63	78	73.5333	-4.76667	7.02222
IEF	2007	CHE	72.7	83.3	64.9	74.6	74.2667	1.56667	6.24444
IEF	2007	CHE	87.7	83.5	92.5	81.5	85.8333	-1.86666	4.44444
IEF	2007	CHE	77.4	57	86	79.9	74.3	-3.1	11.5333
IEF	2007	CHE	80.9	78.5	94.4	79.7	84.2	3.3	6.8
IEF	2007	CHE	84.3	80.8	88.6	78.8	82.7333	-1.56667	3.91111
IEF	2007	CHE	54	37.4	63.4	61.6	54.1333	0.133335	11.1556
IEF	2007	CHE	82.2	92.3	78.8	76	82.3667	0.16667	6.62222
IEF	2007	CHE	81.7	84.1	85.8	76.8	82.2333	0.53333	3.62222
IEF	2007	CHE	93.3	91.7	100	79.4	90.3667	-2.93333	7.31111
IEF	2007	CHE	77.7	76.6	79.2	77.3	77.7	0	1
IEF	2007	CHE	83.3	81.9	85	81	82.6333	-0.66667	1.57778
IEF	2007	CHE	83.3	68.5	94.3	83.2	82	-1.3	9
IEF	2007	CHE	83.1	86.1	88.3	80.2	84.8667	1.76667	3.11111
IEF	2007	CHE	87.9	72.6	97	88.1	85.9	-2	8.86667
IEF	2007	CHE	84.1	85.8	83.6	82.8	84.0667	-0.033334	1.15556
IEF	2007	CHE	80.2	85.3	73.9	81	80.0667	-0.133334	4.11111
IEF	2007	CHE	82.1	82.7	77	82.1	80.6	-1.5	2.4
IEF	2007	CHE	66.8	55.5	62.2	73.7	63.8	-3	6.6
IEF	2007	CHE	72.3	76.4	70.6	65	70.6667	-1.63334	3.82222
IEF	2007	CHE	74.9	64.8	76.9	81	74.2333	-0.66667	6.28889
IEF	2007	CHE	90	76.5	100	80.6	85.7	-4.3	9.53333
IEF	2007	CHE	86.3	88.3	90.5	81.4	86.7333	0.43333	3.55556
IEF	2007	CHE	83.6	91.8	77.7	79.5	83	-0.6	5.86667
IEF	2007	CHE	82	83.6	84.6	80.2	82.8	0.8	1.73333
IEF	2007	CHE	82.9	84	84.5	79.3	82.6	-0.3	2.2
IEF	2007	CHE	83.1	73.7	86.4	80.8	80.3	-2.8	4.4
IEF	2007	CHE	89.6	93.3	79.8	84	85.7	-3.9	5.06667
IEF	2007	CHE	89.5	92.6	86.3	84.6	87.8333	-1.66666	3.17778
IEF	2007	CHE	85.9	84.6	79.9	87.5	84	-1.9	2.73333
IEF	2007	CHE	90	94.1	82.7	87.8	88.2	-1.8	3.93333
IEF	2007	CHE	89.1	77	96.2	85.9	86.3667	-2.73333	6.55556
IEF	2007	CHE	77.3	67.9	78.2	86.7	77.6	0.3	6.46667
IEF	2007	CHE	72.3	61.5	76.8	77.4	71.9	-0.4	6.93333
IEF	2007	CHE	80.2	83.1	81.3	76.3	80.2333	0.03333	2.62222
IEF	2007	CHE	74.7	73.4	82.1	85.2	80.2333	5.53333	4.55556
IEF	2007	CHE	89.1	91.2	92	83.5	88.9	-0.2	3.6
IEF	2007	CHE	83.1	88.1	82.9	79.3	83.4333	0.333334	3.11111
IEF	2007	CHE	85.4	87.1	88.8	80.9	85.6	0.2	3.13333
IEF	2007	CHE	76	83.4	74	78.6	78.6667	2.66666	3.15556
IEF	2007	CHE	88.5	91.3	89.2	85.9	88.8	0.3	1.93333
IEF	2007	CHE	89.9	92.6	88.1	88.2	89.6333	-0.26667	1.97778
IEF	2007	CHE	86.3	82.7	88.8	82.4	84.6333	-1.66667	2.77778
IEF	2007	CHE	76.8	58.6	80.3	84	74.3	-2.5	10.4667
IEF	2007	CHE	90.9	92.3	90.8	87.7	90.2667	-0.63333	1.71111
IEF	2007	CHE	95.8	93.2	98.3	88.3	93.2667	-2.53333	3.35556
IEF	2007	CHE	92.4	95.5	97.5	88.4	93.8	1.4	3.6
IEF	2007	CHE	73.9	53.4	72.6	86.7	70.9	-3	11.6667
IEF	2007	CHE	85.2	85.4	81.7	86.2	84.4333	-0.766666	1.82222
IEF	2007	CHE	86.1	91	82.5	85.1	86.2	0.1	3.2
IEF	2007	CHE	91.5	89.7	92.5	88.5	90.2333	-1.26667	1.51111
IEF	2007	CHE	85.5	82.8	85.4	88.8	85.6667	0.166664	2.08889
IEF	2007	CHE	93.9	91.5	98.1	91.3	93.6333	-0.26667	2.97778
IEF	2007	CHE	89.7	54	95.5	92.7	80.7333	-8.96667	17.8222
IEF	2007	CHE	77.3	84.5	64.7	79.7	76.3	-1	7.73333
IEF	2007	CHE	81.4	80.5	81.4	84.8	82.2333	0.83333	1.71111
IEF	2007	CHE	86.1	89	83	87.9	86.6333	0.53333	2.42222
IEF	2007	CHE	92.4	100	90.6	83.8	91.4667	-0.93333	5.68889
IEF	2007	CHE	72.4	43.5	75.8	83.7	67.6667	-4.73334	16.1111
IEF	2007	CHE	88.5	87.1	88.4	90.6	88.7	0.2	1.26667
IEF	2007	CHE	90	92.4	87.3	85.4	88.3667	-1.63333	2.68889
IEF	2007	CHE	81.9	86.9	77.5	84.6	83	1.1	3.66667
IEF	2007	CHE	84.1	92.5	79.1	81.5	84.3667	0.26667	5.42222
IEF	2007	CHE	87.3	83.3	89.8	88	87.0333	-0.26667	2.48889
IEF	2007	CHE	77.5	81.2	60.5	86.7	76.1333	-1.36667	10.4222
IEF	2007	CHE	81.4	70.5	80.4	92.2	81.0333	-0.36667	7.44444
IEF	2007	CHE	82.4	92.2	71.2	81.9	81.7667	-0.63333	7.04444
IEF	2007	CHE	79.5	75.5	84.5	84.2	81.4	1.9	3.93333
IEF	2007	CHE	82.4	73	90.1	88.9	84	1.6	7.33333
IEF	2007	CHE	81.8	84.6	76.7	84.2	81.8333	0.033336	3.42222
IEF	2007	CHE	84.4	80	88.8	87.7	85.5	1.1	3.66667
IEF	2007	CHE	95.6	95.8	94.8	85.9	92.1667	-3.43334	4.17778
IEF	2007	CHE	90.2	96.8	87.4	83.6	89.2667	-0.93333	5.02222
IEF	2007	CHE	82.4	85.6	69.7	87.1	80.8	-1.6	7.4
IEF	2007	CHE	80.1	65.1	81.8	90.5	79.1333	-0.96667	9.35556
IEF	2007	CHE	90.9	89.8	87.5	94.5	90.6	-0.3	2.6
IEF	2007	CHE	79.3	83.3	83.6	78.4	81.7667	2.46667	2.24444
IEF	2007	CHE	78.3	80.9	77.2	72.1	76.7333	-1.56667	3.08889
IEF	2007	CHE	81.2	70.2	79.8	86	78.6667	-2.53334	5.64444
IEF	2007	CHE	82.4	80	78	84.1	80.7	-1.7	2.26667
IEF	2007	CHE	90.4	90.1	88.1	89	89.0667	-1.33333	0.688889
IEF	2007	CHE	95.7	96.4	95	93	94.8	-0.9	1.2
IEF	2007	CHE	84.1	84	84.1	87.2	85.1	1	1.4
IEF	2007	CHE	84.8	80.5	84.8	88.5	84.6	-0.2	2.73333
IEF	2007	CHE	93.7	91	100	90	93.6667	-0.033336	4.22222
IEF	2007	CHE	90.5	93.9	79.8	93.2	88.9667	-1.53333	6.11111
IEF	2007	CHE	73.7	65	71	90	75.3333	1.63334	9.77778
IEF	2007	CHE	92.2	98.5	72.5	90.6	87.2	-5	9.8
IEF	2007	CHE	79.7	88.6	62.5	90	80.3667	0.66667	11.9111
IEF	2007	CHE	92.1	93.9	91.6	90.4	91.9667	-0.13333	1.28889
IEF	2007	CHE	85.4	85.6	85.2	86.5	85.7667	0.36667	0.488889
IEF	2007	CHE	87.5	83	87.9	91.9	87.6	0.1	3.06667
IEF	2007	CHE	85	73	83.5	91.6	82.7	-2.3	6.46667
IEF	2007	CHE	86.8	90.3	70.1	92.2	84.2	-2.6	9.4
IEF	2007	CHE	88	86.6	83.9	91.8	87.4333	-0.566666	2.91111
IEF	2007	CHE	88.9	84.3	88	93.9	88.7333	-0.16667	3.44444
IEF	2007	CHE	86.3	79.2	89.6	89.1	85.9667	-0.33333	4.51111
IEF	2007	CHE	84.7	87.3	84.4	89.5	87.0667	2.36667	1.77778
IEF	2007	CHE	86.3	90.3	81.6	91	87.6333	1.33333	4.02222
IEF	2007	CHE	85.4	96.8	71.9	87.9	85.5333	0.13333	9.08889
IEF	2007	CHE	90.9	95.2	90	88.9	91.3667	0.46667	2.55556
IEF	2007	CHE	84.5	77.7	88.3	86.5	84.1667	-0.333336	4.31111
IEF	2007	CHE	79.3	68	78	91.2	79.0667	-0.233334	8.08889
IEF	2007	CHE	83.6	78.8	72.8	91.2	80.9333	-2.66667	6.84444
IEF	2007	CHE	88.5	91.4	93.7	85.9	90.3333	1.83334	2.95556
IEF	2007	CHE	92.5	91.9	94	84.6	90.1667	-2.33334	3.71111
IEF	2007	CHE	82.1	84.4	73.6	93.4	83.8	1.7	6.8
IEF	2007	CHE	94.9	96	93.6	92.7	94.1	-0.8	1.26667
IEF	2007	CHE	87.6	86.8	83.4	91.9	87.3667	-0.23333	3.02222
IEF	2007	CHE	91.1	93.8	85.2	93.3	90.7667	-0.33333	3.71111
IEF	2007	CHE	95.5	92.7	95.2	94.7	94.2	-1.3	1
IEF	2007	CHE	95.3	95	97.8	93.3	95.3667	0.06667	1.62222
IEF	2007	CHE	77.8	73.4	77.7	94.8	81.9667	4.16667	8.55556
IEF	2007	CHE	89	90	88.6	86.8	88.4667	-0.53333	1.11111
IEF	2007	CHE	91.4	93	90.6	89.5	91.0333	-0.36667	1.31111
IEF	2007	CHE	89.7	87.1	83.1	93.5	87.9	-1.8	3.73333
IEF	2007	CHE	85.2	80.8	88.7	86.4	85.3	0.1	3
IEF	2007	CHE	92.2	90.4	89.8	94.7	91.6333	-0.56667	2.04444
IEF	2007	CHE	91	92	84.2	90.4	88.8667	-2.13333	3.11111
IEF	2007	CHE	92.7	82.8	97.5	97	92.4333	-0.266666	6.42222
IEF	2007	CHE	92.8	80.5	93.8	95.9	90.0667	-2.73333	6.37778
IEF	2007	CHE	91.7	97.2	79.3	96.8	91.1	-0.6	7.86667
IEF	2007	CHE	94.9	95	90.2	97.6	94.2667	-0.63333	2.71111
IEF	2007	CHE	97.3	100	93.5	97.7	97.0667	-0.233334	2.37778
IEF	2007	CHE	93.7	87.1	98.5	98.8	94.8	1.1	5.13333
IEF	2007	CHE	91.1	85.8	87.6	98.3	90.5667	-0.533334	5.15556
IEF	2007	CHE	89	85.9	82.2	95	87.7	-1.3	4.86667
IEF	2007	CHE	78.6	87.5	71.5	88.9	82.6333	4.03333	7.42222
IEF	2007	CHE	86.2	65.8	88.5	91.9	82.0667	-4.13333	10.8444
IEF	2007	CHE	93.6	94.8	83	96	91.2667	-2.33333	5.51111
IEF	2007	CHE	85.5	78.8	85.6	94	86.1333	0.63333	5.24444
IEF	2007	CHE	85	92.2	66.5	100	86.2333	1.23333	13.1556
IEF	2007	CHE	73	82.6	51	100	77.8667	4.86667	17.9111
IEF	2007	ECOSOC	43.7	53	41.5	31	41.8333	-1.86667	7.44444
IEF	2007	ECOSOC	68.6	80	70	29	59.6667	-8.93333	20.4444
IEF	2007	ECOSOC	56.1	69.9	56	19.9	48.6	-7.5	19.1333
IEF	2007	ECOSOC	68.1	77.8	93	31	67.2667	-0.83333	24.1778
IEF	2007	ECOSOC	66.1	70	70.4	30	56.8	-9.3	17.8667
IEF	2007	ECOSOC	66.8	74	82.7	44	66.9	0.1	15.2667
IEF	2007	ECOSOC	65.9	82.2	62	54.3	66.1667	0.266664	10.6889
IEF	2007	ECOSOC	65.2	71	40.2	47.7	52.9667	-12.2333	12.0222
IEF	2007	ECOSOC	64.1	70.2	93.2	37	66.8	2.7	19.8667
IEF	2007	ECOSOC	56.9	52.6	80.1	44	58.9	2	14.1333
IEF	2007	ECOSOC	49.7	38.5	67.6	46.5	50.8667	1.16667	11.1556
IEF	2007	ECOSOC	74.9	80.5	76	54.6	70.3667	-4.53333	10.5111
IEF	2007	ECOSOC	38.3	50.4	29.5	48.6	42.8333	4.53333	8.88889
IEF	2007	ECOSOC	75.2	88.8	81.1	57.3	75.7333	0.53333	12.2889
IEF	2007	ECOSOC	57	50	67.2	44	53.7333	-3.26667	8.97778
IEF	2007	ECOSOC	64.6	68.6	66.5	59.9	65	0.4	3.4
IEF	2007	ECOSOC	64.2	76.6	64	51.3	63.9667	-0.233333	8.44444
IEF	2007	ECOSOC	72.5	74.8	71.1	56.5	67.4667	-5.03333	7.31111
IEF	2007	ECOSOC	73	81.5	62.9	59.8	68.0667	-4.93333	8.95556
IEF	2007	ECOSOC	79.4	83.5	70.3	66	73.2667	-6.13333	6.82222
IEF	2007	ECOSOC	50.6	61.3	37	47.7	48.6667	-1.93333	8.42222
IEF	2007	ECOSOC	60	56.5	73	56.1	61.8667	1.86667	7.42222
IEF	2007	ECOSOC	66.8	79.3	63.3	51.2	64.6	-2.2	9.8
IEF	2007	ECOSOC	66.8	67.6	90	61.7	73.1	6.3	11.2667
IEF	2007	ECOSOC	76.7	74.7	82.9	64.9	74.1667	-2.53334	6.17778
IEF	2007	ECOSOC	42.5	41.5	49.7	60.7	50.6333	8.13334	6.71111
IEF	2007	ECOSOC	69.4	81.4	62.9	58.6	67.6333	-1.76667	9.17778
IEF	2007	ECOSOC	77.7	70.9	92.4	71.2	78.1667	0.466664	9.48889
IEF	2007	ECOSOC	70.5	70.6	65.6	72.2	69.4667	-1.03333	2.57778
IEF	2007	ECOSOC	72.2	72.9	83.2	62.6	72.9	0.7	6.86667
IEF	2007	ECOSOC	84.4	83.1	80	64.2	75.7667	-8.63333	7.71111
IEF	2007	ECOSOC	78.9	90.8	84.6	59.1	78.1667	-0.733336	12.7111
IEF	2007	ECOSOC	77.2	68	100	70	79.3333	2.13334	13.7778
IEF	2007	ECOSOC	70	54.5	77	40	57.1667	-12.8333	13.2222
IEF	2007	ECOSOC	63.2	71.2	67	60.2	66.1333	2.93333	3.95556
IEF	2007	ECOSOC	57	44.5	54.9	65.7	55.0333	-1.96667	7.11111
IEF	2007	ECOSOC	67.7	71	57.6	60.9	63.1667	-4.53333	5.22222
IEF	2007	ECOSOC	65.4	68.5	71.4	57.9	65.9333	0.533334	5.35556
IEF	2007	ECOSOC	72.4	71.8	81	60	70.9333	-1.46667	7.28889
IEF	2007	ECOSOC	86.5	88.3	80.8	65	78.0333	-8.46667	8.68889
IEF	2007	ECOSOC	70.5	73	74.3	64.7	70.6667	0.166664	3.97778
IEF	2007	ECOSOC	84.8	98	81.6	64.5	81.3667	-3.43333	11.2444
IEF	2007	ECOSOC	67	88.5	55.5	67.5	70.5	3.5	12
IEF	2007	ECOSOC	58.5	47	68.9	67.9	61.2667	2.76667	9.51111
IEF	2007	ECOSOC	86.5	95.4	82.4	73	83.6	-2.9	7.86667
IEF	2007	ECOSOC	70.9	77.2	63.9	70	70.3667	-0.53333	4.55556
IEF	2007	ECOSOC	85.8	93.5	79.5	69	80.6667	-5.13334	8.55556
IEF	2007	ECOSOC	73	81.6	71.2	67.4	73.4	0.4	5.46667
IEF	2007	ECOSOC	82.9	85	90	66.5	80.5	-2.4	9.33333
IEF	2007	ECOSOC	63.3	65.5	54.1	73.5	64.3667	1.06667	6.84444
IEF	2007	ECOSOC	78.1	86.1	79.6	72.8	79.5	1.4	4.46667
IEF	2007	ECOSOC	67.4	42	81.9	69.3	64.4	-3	14.9333
IEF	2007	ECOSOC	69.6	78.1	59.7	69.7	69.1667	-0.433336	6.31111
IEF	2007	ECOSOC	67.2	64.6	74.9	65.9	68.4667	1.26667	4.28889
IEF	2007	ECOSOC	77.4	81.9	74	72.2	76.0333	-1.36667	3.91111
IEF	2007	ECOSOC	70	70.9	62.9	73.8	69.2	-0.8	4.2
IEF	2007	ECOSOC	64.1	73.9	69.8	48.2	63.9667	-0.133333	10.5111
IEF	2007	ECOSOC	66.8	62.7	78.7	67.7	69.7	2.9	6
IEF	2007	ECOSOC	82	82.4	84.1	75	80.5	-1.5	3.66667
IEF	2007	ECOSOC	80.8	90.3	79.6	78.2	82.7	1.9	5.06667
IEF	2007	ECOSOC	79.9	99.4	76	74.7	83.3667	3.46667	10.6889
IEF	2007	ECOSOC	70.9	51.9	69	70.4	63.7667	-7.13333	7.91111
IEF	2007	ECOSOC	69.3	70.8	48	72.4	63.7333	-5.56667	10.4889
IEF	2007	ECOSOC	73.2	76.6	59.2	78	71.2667	-1.93333	8.04444
IEF	2007	ECOSOC	70.4	78.5	62	71	70.5	0.1	5.66667
IEF	2007	ECOSOC	79.9	85.4	82.6	68.1	78.7	-1.2	7.06667
IEF	2007	ECOSOC	64.9	65.9	77	54.6	65.8333	0.933336	7.48889
IEF	2007	ECOSOC	79.7	85.5	86.9	60.5	77.6333	-2.06667	11.4222
IEF	2007	ECOSOC	81.7	88.4	74.4	71.5	78.1	-3.6	6.86667
IEF	2007	ECOSOC	67.7	53.8	75.4	69.8	66.3333	-1.36666	8.35556
IEF	2007	ECOSOC	64.7	78.6	58.5	69	68.7	4	6.8
IEF	2007	ECOSOC	76.6	72.2	89.7	70.5	77.4667	0.86667	8.15556
IEF	2007	ECOSOC	79	76.6	92.1	70.5	79.7333	0.73333	8.24444
IEF	2007	ECOSOC	71.4	73.1	73.9	67.4	71.4667	0.06667	2.71111
IEF	2007	ECOSOC	72.5	72.3	75.8	67.5	71.8667	-0.63333	2.91111
IEF	2007	ECOSOC	72.9	72.7	77.7	70	73.4667	0.56667	2.82222
IEF	2007	ECOSOC	90.6	84.4	94	75	84.4667	-6.13333	6.35556
IEF	2007	ECOSOC	75.9	85.8	54.5	73.4	71.2333	-4.66667	11.1556
IEF	2007	ECOSOC	71.7	68.1	70.4	75.3	71.2667	-0.43333	2.68889
IEF	2007	ECOSOC	78	69	86	79.6	78.2	0.2	6.13333
IEF	2007	ECOSOC	92.1	92.1	79.7	72.5	81.4333	-10.6667	7.11111
IEF	2007	ECOSOC	67.5	81.8	53	78	70.9333	3.43333	11.9556
IEF	2007	ECOSOC	75.6	49	78.4	74	67.1333	-8.46667	12.0889
IEF	2007	ECOSOC	75.5	69.7	83.9	75.9	76.5	1	4.93333
IEF	2007	ECOSOC	88.6	78	88.7	82.5	83.0667	-5.53333	3.75556
IEF	2007	ECOSOC	76.9	74.5	75.4	87	78.9667	2.06667	5.35556
IEF	2007	ECOSOC	74.5	78.4	88.1	67.4	77.9667	3.46667	7.04444
IEF	2007	ECOSOC	69.8	75	67.7	72.3	71.6667	1.86666	2.64444
IEF	2007	ECOSOC	78.8	78.1	83.9	74.2	78.7333	-0.06667	3.44444
IEF	2007	ECOSOC	90	89.3	87	76.3	84.2	-5.8	5.26667
IEF	2007	ECOSOC	61.7	49.5	58.5	75.8	61.2667	-0.433334	9.68889
IEF	2007	ECOSOC	81.1	67	81.8	78.1	75.6333	-5.46667	5.75556
IEF	2007	ECOSOC	65.7	57	79.2	71.5	69.2333	3.53333	8.15556
IEF	2007	ECOSOC	69.9	67.3	81.1	73.4	73.9333	4.03333	4.77778
IEF	2007	ECOSOC	93.4	97.5	93.9	61.2	84.2	-9.2	15.3333
IEF	2007	ECOSOC	75.7	74.4	87.7	67.3	76.4667	0.76667	7.48889
IEF	2007	ECOSOC	78.6	88.9	91.1	68.2	82.7333	4.13333	9.68889
IEF	2007	ECOSOC	81.1	83.2	77.6	70.9	77.2333	-3.86667	4.22222
IEF	2007	ECOSOC	56.3	60	52	69.1	60.3667	4.06667	5.82222
IEF	2007	ECOSOC	67.6	70.6	57.3	71.8	66.5667	-1.03333	6.17778
IEF	2007	ECOSOC	75.5	65.5	85.6	70.4	73.8333	-1.66666	7.84444
IEF	2007	ECOSOC	78.3	67.4	85.4	77.7	76.8333	-1.46666	6.28889
IEF	2007	ECOSOC	82.5	85.4	91.3	72.7	83.1333	0.63333	6.95556
IEF	2007	ECOSOC	79.4	83.2	84.3	75.4	80.9667	1.56667	3.71111
IEF	2007	ECOSOC	72.3	87.9	65.4	84.7	79.3333	7.03334	9.28889
IEF	2007	ECOSOC	79.9	86.2	74.3	79.7	80.0667	0.166666	4.08889
IEF	2007	ECOSOC	87.7	94.5	84.2	82.4	87.0333	-0.66667	4.97778
IEF	2007	ECOSOC	84	83.7	85.8	82.2	83.9	-0.1	1.26667
IEF	2007	ECOSOC	76.5	76.4	72	77.4	75.2667	-1.23333	2.17778
IEF	2007	ECOSOC	83.8	79.9	92.2	82.3	84.8	1	4.93333
IEF	2007	ECOSOC	78.3	66.8	84.5	82.1	77.8	-0.5	7.33333
IEF	2007	ECOSOC	69.5	83.9	54.4	86.1	74.8	5.3	13.6
IEF	2007	ECOSOC	82.5	77.8	78.9	88.3	81.6667	-0.833336	4.42222
IEF	2007	ECOSOC	74.1	58.8	77.4	83.2	73.1333	-0.96667	9.55556
IEF	2007	ECOSOC	77.5	74	87.7	85.9	82.5333	5.03333	5.68889
IEF	2007	ECOSOC	72.2	70	88.9	68.4	75.7667	3.56667	8.75556
IEF	2007	ECOSOC	75.6	69.9	95.4	70.4	78.5667	2.96667	11.2222
IEF	2007	ECOSOC	67.3	43	90.4	69.3	67.5667	0.266666	16.3778
IEF	2007	ECOSOC	71.8	53.4	81.5	70	68.3	-3.5	9.93333
IEF	2007	ECOSOC	85.1	85.6	86.8	77.1	83.1667	-1.93334	4.04444
IEF	2007	ECOSOC	83	82.6	78.4	80.4	80.4667	-2.53333	1.42222
IEF	2007	ECOSOC	77.2	74.1	73.5	79.1	75.5667	-1.63333	2.35556
IEF	2007	ECOSOC	74.7	77.9	84.8	63.7	75.4667	0.76667	7.84444
IEF	2007	ECOSOC	77.2	84	78	49.8	70.6	-6.6	13.8667
IEF	2007	ECOSOC	68.9	69.1	69.9	72	70.3333	1.43334	1.11111
IEF	2007	ECOSOC	82.7	85.3	90.6	73.5	83.1333	0.43333	6.42222
IEF	2007	ECOSOC	69.3	60.8	80	67	69.2667	-0.03333	7.15556
IEF	2007	ECOSOC	80.4	82.4	85.5	68.4	78.7667	-1.63333	6.91111
IEF	2007	ECOSOC	73.1	71.4	72	72	71.8	-1.3	0.266667
IEF	2007	ECOSOC	72.6	72	71.5	77.5	73.6667	1.06666	2.55556
IEF	2007	ECOSOC	68	70.8	91.8	70.5	77.7	9.7	9.4
IEF	2007	ECOSOC	83.3	94.6	68.2	78.4	80.4	-2.9	9.46667
IEF	2007	ECOSOC	72.2	74.1	71.3	66.8	70.7333	-1.46667	2.62222
IEF	2007	ECOSOC	87.6	92.3	84.9	77	84.7333	-2.86667	5.15556
IEF	2007	ECOSOC	83.4	85.2	78.7	78.9	80.9333	-2.46667	2.84444
IEF	2007	ECOSOC	71.8	71.5	60.6	76.6	69.5667	-2.23333	5.97778
IEF	2007	ECOSOC	87	89.7	90	82	87.2333	0.23333	3.48889
IEF	2007	ECOSOC	82.5	80.4	90	73.6	81.3333	-1.16666	5.77778
IEF	2007	ECOSOC	74	72.3	69.4	79.1	73.6	-0.4	3.66667
IEF	2007	ECOSOC	72.7	72.4	67.4	80.9	73.5667	0.866666	4.88889
IEF	2007	ECOSOC	88.2	89	81.2	82.8	84.3333	-3.86666	3.11111
IEF	2007	ECOSOC	87.2	85.6	92	84.4	87.3333	0.133336	3.11111
IEF	2007	ECOSOC	63.8	47.5	67.7	80.5	65.2333	1.43333	11.8222
IEF	2007	ECOSOC	86.1	85	86.3	85.3	85.5333	-0.56667	0.511111
IEF	2007	ECOSOC	85.6	88.3	82.4	83.5	84.7333	-0.86667	2.37778
IEF	2007	ECOSOC	77.4	71.2	90	83.5	81.5667	4.16667	6.91111
IEF	2007	ECOSOC	86.6	81.8	87.3	85	84.7	-1.9	1.93333
IEF	2007	ECOSOC	89.5	83.4	95	89.5	89.3	-0.2	3.93333
IEF	2007	ECOSOC	79.1	76.1	70	86.2	77.4333	-1.66667	5.84444
IEF	2007	ECOSOC	81.5	63.2	76.2	81.6	73.6667	-7.83334	6.97778
IEF	2007	ECOSOC	61.5	55.3	54.3	86.4	65.3333	3.83334	14.0444
IEF	2007	ECOSOC	86.1	80.1	88.6	83.8	84.1667	-1.93334	2.95556
IEF	2007	ECOSOC	90.5	90.3	87.9	92	90.0667	-0.433334	1.44444
IEF	2007	ECOSOC	70.9	73.3	73.2	69.4	71.9667	1.06667	1.71111
IEF	2007	ECOSOC	81.3	87.6	83.5	74.6	81.9	0.6	4.86667
IEF	2007	ECOSOC	77.1	86.8	64.2	77.2	76.0667	-1.03333	7.91111
IEF	2007	ECOSOC	58.5	45.5	50.6	80.5	58.8667	0.366665	14.4222
IEF	2007	ECOSOC	87.6	71.7	92.1	87.7	83.8333	-3.76666	8.08889
IEF	2007	ECOSOC	83.4	98.5	67	85.2	83.5667	0.166666	11.0444
IEF	2007	ECOSOC	84.1	84.4	84.1	84.6	84.3667	0.26667	0.177778
IEF	2007	ECOSOC	80.8	60.6	79	78.3	72.6333	-8.16667	8.02222
IEF	2007	ECOSOC	83	93.1	63.4	88.4	81.6333	-1.36667	12.1556
IEF	2007	ECOSOC	80.7	74.7	85.5	83.3	81.1667	0.466664	4.31111
IEF	2007	ECOSOC	75.9	60	73	81.4	71.4667	-4.43333	7.64444
IEF	2007	ECOSOC	87.9	86.2	85.7	83.4	85.1	-2.8	1.13333
IEF	2007	ECOSOC	85.7	88.2	80.6	86.5	85.1	-0.6	3
IEF	2007	ECOSOC	93.6	95.2	96.6	82.9	91.5667	-2.03333	5.77778
IEF	2007	ECOSOC	70.2	72	63.5	87	74.1667	3.96666	8.55556
IEF	2007	ECOSOC	82.5	72	81.5	90.1	81.2	-1.3	6.13333
IEF	2007	ECOSOC	79.5	70.9	74.4	88.3	77.8667	-1.63333	6.95556
IEF	2007	ECOSOC	72.8	75.5	75.8	71.5	74.2667	1.46667	1.84444
IEF	2007	ECOSOC	91.3	99.4	91.8	80.8	90.6667	-0.633336	6.57778
IEF	2007	ECOSOC	84.3	82.3	92.5	79.8	84.8667	0.56667	5.08889
IEF	2007	ECOSOC	84.4	76.4	88.8	85.4	83.5333	-0.86667	4.75556
IEF	2007	ECOSOC	66.9	80.7	55.7	84.8	73.7333	6.83333	12.0222
IEF	2007	ECOSOC	84.5	81.9	76	86.1	81.3333	-3.16666	3.55556
IEF	2007	ECOSOC	87.8	86	76.2	88.8	83.6667	-4.13334	4.97778
IEF	2007	ECOSOC	88	70.5	89.7	88.3	82.8333	-5.16666	8.22222
IEF	2007	ECOSOC	79.4	68.5	77	90.9	78.8	-0.6	8.06667
IEF	2007	ECOSOC	73.5	72.6	75.8	80	76.1333	2.63333	2.57778
IEF	2007	ECOSOC	60.6	54.7	44.5	81.4	60.2	-0.4	14.1333
IEF	2007	ECOSOC	83.1	79.6	84	84.2	82.6	-0.5	2
IEF	2007	ECOSOC	80.6	82.9	74.5	81	79.4667	-1.13333	3.31111
IEF	2007	ECOSOC	85.6	93.4	63.5	85.4	80.7667	-4.83333	11.5111
IEF	2007	ECOSOC	84.6	79.5	95	82.4	85.6333	1.03333	6.24444
IEF	2007	ECOSOC	71.5	54	100	94.6	82.8667	11.3667	19.2444
IEF	2007	ECOSOC	82.8	81.4	73.9	85.5	80.2667	-2.53333	4.24444
IEF	2007	ECOSOC	81.3	76.9	93	91.1	87	5.7	6.73333
IEF	2007	ECOSOC	71.2	96.4	61.5	77.5	78.4667	7.26667	11.9556
IEF	2007	ECOSOC	71.5	72.7	68.9	82.4	74.6667	3.16666	5.15556
IEF	2007	ECOSOC	80.1	79.4	89.6	82	83.6667	3.56666	3.95556
IEF	2007	ECOSOC	81.2	70.5	90.8	83.6	81.6333	0.43333	7.42222
IEF	2007	ECOSOC	87.9	89.4	86.8	86	87.4	-0.5	1.33333
IEF	2007	ECOSOC	76.3	68.3	87.5	89.5	81.7667	5.46667	8.97778
IEF	2007	ECOSOC	84.6	81.9	80.3	90.2	84.1333	-0.46667	4.04444
IEF	2007	ECOSOC	87.1	81.7	80	90	83.9	-3.2	4.06667
IEF	2007	ECOSOC	80	72	81.2	91.8	81.6667	1.66666	6.75556
IEF	2007	ECOSOC	83.7	86	70	87.9	81.3	-2.4	7.53333
IEF	2007	ECOSOC	89.4	82.8	68.9	90.6	80.7667	-8.63333	7.91111
IEF	2007	ECOSOC	83.8	72.7	91.1	90.9	84.9	1.1	8.13333
IEF	2007	ECOSOC	82	76.9	67.5	91.8	78.7333	-3.26667	8.71111
IEF	2007	ECOSOC	90.7	90.1	67	91.7	82.9333	-7.76667	10.6222
IEF	2007	ECOSOC	93.2	82.3	96.1	90.7	89.7	-3.5	4.93333
IEF	2007	ECOSOC	91.4	83.4	94.7	91.8	89.9667	-1.43333	4.37778
IEF	2007	ECOSOC	92.9	74.5	93.5	92.1	86.7	-6.2	8.13333
IEF	2007	ECOSOC	92.9	74.3	91.9	94.8	87	-5.9	8.46667
IEF	2007	ECOSOC	82.4	80.4	66	90	78.8	-3.6	8.53333
IEF	2007	ECOSOC	66	38.5	70	91.2	66.5667	0.566666	18.7111
IEF	2007	ECOSOC	84.2	84.5	79.7	79.5	81.2333	-2.96667	2.17778
IEF	2007	ECOSOC	79	75.4	62.5	84.6	74.1667	-4.83334	7.77778
IEF	2007	ECOSOC	71.2	50.6	84.4	80.3	71.7667	0.56667	14.1111
IEF	2007	ECOSOC	87.8	89.1	87.6	87.2	87.9667	0.16667	0.755556
IEF	2007	ECOSOC	78.8	68.1	74	93.3	78.4667	-0.33333	9.88889
IEF	2007	ECOSOC	88.1	93.6	82.1	95.9	90.5333	2.43333	5.62222
IEF	2007	ECOSOC	71.3	43.9	75.5	90.9	70.1	-1.2	17.4667
IEF	2007	ECOSOC	87.9	76	83.9	95.8	85.2333	-2.66667	7.04444
IEF	2007	ECOSOC	80.2	81.4	63.3	85.4	76.7	-3.5	8.93333
IEF	2007	ECOSOC	90.3	89.1	81.9	94.5	88.5	-1.8	4.4
IEF	2007	ECOSOC	71.7	64.5	85.3	91.8	80.5333	8.83333	10.6889
IEF	2007	ECOSOC	90.6	81	89.4	97.9	89.4333	-1.16667	5.64444
IEF	2007	ECOSOC	83.1	68.2	82.1	97.9	82.7333	-0.36667	10.1111
IEF	2007	ECOSOC	85.7	84.7	75.3	83	81	-4.7	3.8
IEF	2007	ECOSOC	72.5	80.5	64.4	76.5	73.8	1.3	6.26667
IEF	2007	ECOSOC	83.4	87.7	68	87.3	81	-2.4	8.66667
IEF	2007	ECOSOC	71.2	64	59	89.4	70.8	-0.4	12.4
IEF	2007	ECOSOC	69.2	69.5	56.4	93.3	73.0667	3.86667	13.4889
IEF	2007	ECOSOC	88.7	77.6	88.6	92.5	86.2333	-2.46667	5.75556
IEF	2007	ECOSOC	87	78.1	90.4	96	88.1667	1.16666	6.71111
IEF	2007	ECOSOC	92	81.2	83.3	95.2	86.5667	-5.43333	5.75556
IEF	2007	ECOSOC	82	78.9	75.5	98.4	84.2667	2.26667	9.42222
IEF	2007	ECOSOC	89.7	81.4	75.5	98.6	85.1667	-4.53334	8.95556
IEF	2007	ECOSOC	85.1	81.6	92.1	99	90.9	5.8	6.2
IEF	2007	ECOSOC	95.8	79.7	89.6	100	89.7667	-6.03333	6.82222
IEF	2007	ECOSOC	79.3	66.2	74.7	96	78.9667	-0.33333	11.3556
IEF	2007	ECOSOC	81.5	79.8	67.6	99.7	82.3667	0.86667	11.5556
IEF	2007	ECOSOC	88.1	66.8	93.8	96.5	85.7	-2.4	12.6
IEF	2007	ECOSOC	74	76.5	61.5	98	78.6667	4.66666	12.8889
IEF	2007	ECOSOC	76	56	64.8	100	73.6	-2.4	17.6
IEF	2007	ENG	37	46.5	17.5	78.3	47.4333	10.4333	20.5778
IEF	2007	ENG	34	32.5	43.4	11.4	29.1	-4.9	11.8
IEF	2007	ENG	47.7	55	60.5	28	47.8333	0.133332	13.2222
IEF	2007	ENG	59.6	57.6	83.9	28.3	56.6	-3	18.8667
IEF	2007	ENG	61.7	78.3	58.5	44	60.2667	-1.43333	12.0222
IEF	2007	ENG	67	70.5	74	56.5	67	0	7
IEF	2007	ENG	63.1	45	95	50.9	63.6333	0.533335	20.9111
IEF	2007	ENG	45.9	66.2	44	45	51.7333	5.83333	9.64444
IEF	2007	ENG	59.9	50.5	68.4	66.1	61.6667	1.76667	7.44444
IEF	2007	ENG	65.4	72	70.5	49.5	64	-1.4	9.66667
IEF	2007	ENG	49.5	42.8	67.7	52.8	54.4333	4.93333	8.84444
IEF	2007	ENG	71.5	72	77.1	59	69.3667	-2.13333	6.91111
IEF	2007	ENG	63.3	56.6	80	59	65.2	1.9	9.86667
IEF	2007	ENG	80.1	88.7	98	57.9	81.5333	1.43333	15.7556
IEF	2007	ENG	57.7	55.9	57.8	55.4	56.3667	-1.33333	0.955556
IEF	2007	ENG	61	78.8	36	64.5	59.7667	-1.23333	15.8444
IEF	2007	ENG	63.4	80.3	67.9	54.7	67.6333	4.23333	8.62222
IEF	2007	ENG	74.8	80.6	77.2	67	74.9333	0.133334	5.28889
IEF	2007	ENG	73.6	73.8	84.7	67.3	75.2667	1.66667	6.28889
IEF	2007	ENG	58	53.9	66.6	49	56.5	-1.5	6.73333
IEF	2007	ENG	78	82.2	79	75	78.7333	0.73333	2.48889
IEF	2007	ENG	72.2	78.6	69.6	65	71.0667	-1.13333	5.02222
IEF	2007	ENG	81.2	84.8	84.8	68	79.2	-2	7.46667
IEF	2007	ENG	74.8	71.4	89.2	71.4	77.3333	2.53334	7.91111
IEF	2007	ENG	68.1	55	81	65	67	-1.1	9.33333
IEF	2007	ENG	79	72.4	93.5	66.5	77.4667	-1.53333	10.6889
IEF	2007	ENG	72.1	76.2	69.2	66	70.4667	-1.63333	3.82222
IEF	2007	ENG	59.8	56.5	65.6	67.5	63.2	3.4	4.46667
IEF	2007	ENG	53.1	45.4	51	64.7	53.7	0.6	7.33333
IEF	2007	ENG	70.5	75.2	67.5	64.3	69	-1.5	4.13333
IEF	2007	ENG	79.5	89.6	81.6	64	78.4	-1.1	9.6
IEF	2007	ENG	74	70.5	72.4	76.3	73.0667	-0.933334	2.15556
IEF	2007	ENG	74	78.5	72.8	70.7	74	0	3
IEF	2007	ENG	64.6	56	61.2	72.4	63.2	-1.4	6.13333
IEF	2007	ENG	73	100	70	65.9	78.6333	5.63333	14.2444
IEF	2007	ENG	77	73.3	84	71.3	76.2	-0.8	5.2
IEF	2007	ENG	77.1	80.9	72	77.2	76.7	-0.4	3.13333
IEF	2007	ENG	71.9	60.1	79.7	75.8	71.8667	-0.03333	7.84444
IEF	2007	ENG	68.8	89.7	54.5	65.6	69.9333	1.13333	13.1778
IEF	2007	ENG	67.9	63.6	73.7	71.5	69.6	1.7	4
IEF	2007	ENG	77.2	76.6	76.7	77.5	76.9333	-0.266666	0.377778
IEF	2007	ENG	90.6	89.3	93	85.8	89.3667	-1.23333	2.42222
IEF	2007	ENG	72	66.9	77.1	67.6	70.5333	-1.46667	4.37778
IEF	2007	ENG	70.5	53	60.6	79	64.2	-6.3	9.86667
IEF	2007	ENG	87.6	89.7	75.6	87.5	84.2667	-3.33333	5.77778
IEF	2007	ENG	84.1	88.5	92.6	70.8	83.9667	-0.13333	8.77778
IEF	2007	ENG	76	76.5	78.3	73.4	76.0667	0.066666	1.77778
IEF	2007	ENG	85.2	79.1	85.7	74	79.6	-5.6	4.06667
IEF	2007	ENG	79.5	83.2	78.9	76.3	79.4667	-0.03333	2.48889
IEF	2007	ENG	77.3	67.5	76.7	82	75.4	-1.9	5.26667
IEF	2007	ENG	70.5	74	70.5	70.6	71.7	1.2	1.53333
IEF	2007	ENG	78.3	90.1	74.5	77.1	80.5667	2.26667	6.35556
IEF	2007	ENG	71.5	79.3	63.9	78.2	73.8	2.3	6.6
IEF	2007	ENG	71.1	66	73.2	72.9	70.7	-0.4	3.13333
IEF	2007	ENG	86.7	84.5	97.2	77.8	86.5	-0.2	7.13333
IEF	2007	ENG	72.2	70.1	71.3	79.6	73.6667	1.46666	3.95556
IEF	2007	ENG	85.9	86.1	93	78.5	85.8667	-0.03333	4.91111
IEF	2007	ENG	81.7	74.3	79.3	83.9	79.1667	-2.53334	3.24444
IEF	2007	ENG	74.6	64.5	78.6	82.3	75.1333	0.53333	7.08889
IEF	2007	ENG	78.2	78.1	78.7	78.2	78.3333	0.133336	0.244444
IEF	2007	ENG	78	78.3	73.9	80.9	77.7	-0.3	2.53333
IEF	2007	ENG	81	86.1	74.5	83.1	81.2333	0.23333	4.48889
IEF	2007	ENG	68.6	66	61.1	79.8	68.9667	0.36667	7.22222
IEF	2007	ENG	90.1	88.5	88.5	79.1	85.3667	-4.73333	4.17778
IEF	2007	ENG	76.3	74.7	75.2	80.4	76.7667	0.46667	2.42222
IEF	2007	ENG	81.3	72	84.4	89.1	81.8333	0.533336	6.55556
IEF	2007	ENG	74.5	76	71	71.2	72.7333	-1.76667	2.17778
IEF	2007	ENG	73.5	78.5	51.4	78	69.3	-4.2	11.9333
IEF	2007	ENG	66.8	68.3	38	82.2	62.8333	-3.96667	16.5556
IEF	2007	ENG	84.6	90	72.7	76	79.5667	-5.03333	6.95556
IEF	2007	ENG	74.8	74.7	73.2	76.2	74.7	-0.1	1
IEF	2007	ENG	66.9	56.3	68.8	76.6	67.2333	0.33333	7.28889
IEF	2007	ENG	81.4	76.6	86.3	78.5	80.4667	-0.93333	3.88889
IEF	2007	ENG	80.4	82.9	76	85.2	81.3667	0.96667	3.57778
IEF	2007	ENG	70.5	60.7	87.3	79.5	75.8333	5.33334	10.0889
IEF	2007	ENG	83.6	79.3	84.6	84.9	82.9333	-0.666666	2.42222
IEF	2007	ENG	79	91.1	59.4	82.5	77.6667	-1.33334	12.1778
IEF	2007	ENG	81.1	85.2	66	83.5	78.2333	-2.86667	8.15556
IEF	2007	ENG	81.1	80.5	81.6	82.5	81.5333	0.43333	0.688889
IEF	2007	ENG	79.2	80.7	76.1	79	78.6	-0.6	1.66667
IEF	2007	ENG	87.2	83.1	92.5	85.5	87.0333	-0.16667	3.64444
IEF	2007	ENG	79	71	74.1	85.4	76.8333	-2.16666	5.71111
IEF	2007	ENG	88.5	89.8	89.1	86.7	88.5333	0.03333	1.22222
IEF	2007	ENG	64.5	78.6	48.1	81	69.2333	4.73333	14.0889
IEF	2007	ENG	75.3	67.7	67.1	82.9	72.5667	-2.73333	6.88889
IEF	2007	ENG	82.3	89.7	63	85.9	79.5333	-2.76667	11.0222
IEF	2007	ENG	50	72	27.5	76.1	58.5333	8.53333	20.6889
IEF	2007	ENG	85.2	77.2	92	81	83.4	-1.8	5.73333
IEF	2007	ENG	85.8	88.7	86.4	82.1	85.7333	-0.06667	2.42222
IEF	2007	ENG	83	76.5	87.5	81.9	81.9667	-1.03333	3.68889
IEF	2007	ENG	88.2	85.3	97	83.3	88.5333	0.33333	5.64444
IEF	2007	ENG	68.7	83	45.2	78.8	69	0.3	15.8667
IEF	2007	ENG	82.7	79	81.7	85.8	82.1667	-0.533336	2.42222
IEF	2007	ENG	84.2	91	79.2	91.9	87.3667	3.16667	5.44444
IEF	2007	ENG	86.9	93.7	85.5	83.2	87.4667	0.56667	4.15556
IEF	2007	ENG	87.9	64	86	90.4	80.1333	-7.76667	10.7556
IEF	2007	ENG	75.1	65.6	77.4	85.9	76.3	1.2	7.13333
IEF	2007	ENG	65.8	67.4	64.9	67	66.4333	0.633334	1.02222
IEF	2007	ENG	79.1	74	81.7	74.6	76.7667	-2.33333	3.28889
IEF	2007	ENG	70.1	72.6	59	81	70.8667	0.76667	7.91111
IEF	2007	ENG	71.3	60.5	78.1	74.3	70.9667	-0.33333	6.97778
IEF	2007	ENG	83.8	80.7	83.9	82	82.2	-1.6	1.13333
IEF	2007	ENG	77.2	72.5	72.6	80.4	75.1667	-2.03334	3.48889
IEF	2007	ENG	86.4	87.6	88.4	83.5	86.5	0.1	2
IEF	2007	ENG	83.4	91.9	76.4	85.5	84.6	1.2	5.46667
IEF	2007	ENG	87.2	94.4	83	86.4	87.9333	0.733334	4.31111
IEF	2007	ENG	92.3	91.9	93.5	87.9	91.1	-1.2	2.13333
IEF	2007	ENG	84.4	75	93.6	88.9	85.8333	1.43334	7.22222
IEF	2007	ENG	89	68.5	92.5	90	83.6667	-5.33334	10.1111
IEF	2007	ENG	90.7	87	95.4	88.3	90.2333	-0.46667	3.44444
IEF	2007	ENG	87.5	90.9	84.2	87.3	87.4667	-0.03333	2.28889
IEF	2007	ENG	95.6	100	82.4	91.7	91.3667	-4.23333	5.97778
IEF	2007	ENG	66.8	96.9	40.1	88.7	75.2333	8.43333	23.4222
IEF	2007	ENG	83	81.4	75.2	91.4	82.6667	-0.333336	5.82222
IEF	2007	ENG	84.3	82.3	74.9	86.6	81.2667	-3.03333	4.24444
IEF	2007	ENG	73.4	70.9	68.6	88.1	75.8667	2.46667	8.15556
IEF	2007	ENG	74.9	82.3	53.5	95	76.9333	2.03333	15.6222
IEF	2007	ENG	89.6	98.6	76.3	95.3	90.0667	0.466666	9.17778
IEF	2007	ENG	86	70.6	80	97.7	82.7667	-3.23333	9.95556
IEF	2007	ENG	88.8	90.3	78.8	88	85.7	-3.1	4.6
IEF	2007	ENG	86.9	82.2	73.9	95.5	83.8667	-3.03333	7.75556
IEF	2007	ENG	87.9	70	92.7	100	87.5667	-0.333334	11.7111
IEF	2007	ENV	12.2	0	11.6	25	12.2	0	8.53333
IEF	2007	ENV	42.2	56.1	55	14	41.7	-0.5	18.4667
IEF	2007	ENV	81.9	84.9	80.6	70	78.5	-3.4	5.66667
IEF	2007	ENV	63	75.5	65.9	54.9	65.4333	2.43333	7.02222
IEF	2007	ENV	58.9	67	37.2	65.5	56.5667	-2.33333	12.9111
IEF	2007	ENV	89.6	87.6	88.8	74.7	83.7	-5.9	6
IEF	2007	ENV	80.6	77.4	97	65.4	79.9333	-0.666666	11.3778
IEF	2007	ENV	66.1	84.3	78.5	50.2	71	4.9	13.8667
IEF	2007	ENV	60.8	58.5	69.7	54	60.7333	-0.066666	5.97778
IEF	2007	ENV	70	70.8	74.2	52.5	65.8333	-4.16666	8.88889
IEF	2007	ENV	60.6	53.7	75.9	51.5	60.3667	-0.233335	10.3556
IEF	2007	ENV	69.2	72.8	82.4	52.3	69.1667	-0.033336	11.2444
IEF	2007	ENV	58.1	69.5	51	52.5	57.6667	-0.433332	7.88889
IEF	2007	ENV	65.6	67.5	60	68.6	65.3667	-0.23333	3.57778
IEF	2007	ENV	44.5	40.5	41.5	59.5	47.1667	2.66667	8.22222
IEF	2007	ENV	67.5	77.6	62.1	60.5	66.7333	-0.76667	7.24444
IEF	2007	ENV	74.2	82.7	76.9	70	76.5333	2.33333	4.35556
IEF	2007	ENV	71.5	85.3	61.4	74.2	73.6333	2.13333	8.15556
IEF	2007	ENV	85.1	94.6	87.7	72.9	85.0667	-0.033334	8.11111
IEF	2007	ENV	81.8	77.4	84.5	74.2	78.7	-3.1	3.86667
IEF	2007	ENV	73.8	83	81.3	57.8	74.0333	0.23333	10.8222
IEF	2007	ENV	75.9	82	84.2	63.5	76.5667	0.666666	8.71111
IEF	2007	ENV	82	86.6	77.9	69	77.8333	-4.16666	5.88889
IEF	2007	ENV	74.6	80.5	76	65	73.8333	-0.766664	5.88889
IEF	2007	ENV	83.4	85.3	88.6	70.1	81.3333	-2.06666	7.48889
IEF	2007	ENV	75.8	89	68.2	72	76.4	0.6	8.4
IEF	2007	ENV	76.2	76	85.7	61.5	74.4	-1.8	8.6
IEF	2007	ENV	71.5	94.5	65.2	66.5	75.4	3.9	12.7333
IEF	2007	ENV	56.7	73.8	36	60	56.6	-0.1	13.7333
IEF	2007	ENV	73.6	67.5	88	73.7	76.4	2.8	7.73333
IEF	2007	ENV	66.5	56	71.2	74	67.0667	0.566666	7.37778
IEF	2007	ENV	72.5	60.8	83	70.5	71.4333	-1.06667	7.71111
IEF	2007	ENV	77.5	73.7	90.4	70.8	78.3	0.8	8.06667
IEF	2007	ENV	66.5	66.7	66.9	66.5	66.7	0.2	0.133333
IEF	2007	ENV	65.8	68.1	47.7	72.4	62.7333	-3.06667	10.0222
IEF	2007	ENV	84.9	87.3	84.7	81.9	84.6333	-0.26667	1.82222
IEF	2007	ENV	81	76.7	74.3	83.9	78.3	-2.7	3.73333
IEF	2007	ENV	81.5	87	83.8	60.6	77.1333	-4.36667	11.0222
IEF	2007	ENV	71.9	78.3	70.2	67.9	72.1333	0.23333	4.11111
IEF	2007	ENV	73.6	72.5	76.4	76.4	75.1	1.5	1.73333
IEF	2007	ENV	69.8	73.5	70.8	62	68.7667	-1.03333	4.51111
IEF	2007	ENV	47.5	55	25	62.7	47.5667	0.066666	15.0444
IEF	2007	ENV	84.3	93.5	84.5	76.8	84.9333	0.633334	5.71111
IEF	2007	ENV	71.5	90.6	58.5	66	71.7	0.2	12.6
IEF	2007	ENV	64.5	65.5	70	69.2	68.2333	3.73333	1.82222
IEF	2007	ENV	83.9	85.1	87.5	74	82.2	-1.7	5.46667
IEF	2007	ENV	84.8	78.7	98.5	77.3	84.8333	0.033336	9.11111
IEF	2007	ENV	65.1	51.5	80.4	62.1	64.6667	-0.433336	10.4889
IEF	2007	ENV	84.1	88.8	90.1	65.6	81.5	-2.6	10.6
IEF	2007	ENV	75.5	81.9	80.7	72.5	78.3667	2.86667	3.91111
IEF	2007	ENV	81	86.7	88.5	71.7	82.3	1.3	7.06667
IEF	2007	ENV	78.8	84.6	81.8	67.3	77.9	-0.9	7.06667
IEF	2007	ENV	74.9	69.1	82.4	78.7	76.7333	1.83333	5.08889
IEF	2007	ENV	78.9	82.3	75.6	79.2	79.0333	0.13333	2.28889
IEF	2007	ENV	65	59.2	78	60.8	66	1	8
IEF	2007	ENV	74	72.6	72.7	75.5	73.6	-0.4	1.26667
IEF	2007	ENV	69.2	67.6	72	67.4	69	-0.2	2
IEF	2007	ENV	83.3	90.6	91.5	70	84.0333	0.73333	9.35556
IEF	2007	ENV	65.1	83	39.7	67	63.2333	-1.86667	15.6889
IEF	2007	ENV	63.7	57.5	70.2	65.5	64.4	0.7	4.6
IEF	2007	ENV	78.8	80	82.9	70.9	77.9333	-0.866666	4.68889
IEF	2007	ENV	72.9	67.5	74.7	72.5	71.5667	-1.33333	2.71111
IEF	2007	ENV	71.5	65.3	80.2	71.5	72.3333	0.833336	5.24444
IEF	2007	ENV	89.6	95.1	95.2	74	88.1	-1.5	9.4
IEF	2007	ENV	75.1	74.9	74.5	75.3	74.9	-0.2	0.266667
IEF	2007	ENV	76.9	79.8	74	77.5	77.1	0.2	2.06667
IEF	2007	ENV	92.5	94	91.2	80.8	88.6667	-3.83334	5.24444
IEF	2007	ENV	76.1	76.7	78	73.7	76.1333	0.03333	1.62222
IEF	2007	ENV	88	93.6	85.2	79.5	86.1	-1.9	5
IEF	2007	ENV	85.3	87.8	87.5	82	85.7667	0.46667	2.51111
IEF	2007	ENV	82	87.1	79.5	78.9	81.8333	-0.166664	3.51111
IEF	2007	ENV	85.6	89.6	85.6	75.8	83.6667	-1.93334	5.24444
IEF	2007	ENV	71.2	54.3	63.5	76	64.6	-6.6	7.6
IEF	2007	ENV	87.6	83.9	94.9	86.7	88.5	0.9	4.26667
IEF	2007	ENV	67.8	73	58	77.6	69.5333	1.73333	7.68889
IEF	2007	ENV	79.1	85.1	71.2	77.8	78.0333	-1.06667	4.71111
IEF	2007	ENV	71.5	87	66.8	71.3	75.0333	3.53333	7.97778
IEF	2007	ENV	79.1	79.7	88.7	63.6	77.3333	-1.76666	9.15556
IEF	2007	ENV	66.5	63.1	57.6	70.2	63.6333	-2.86666	4.37778
IEF	2007	ENV	76.7	75.2	78.2	76.2	76.5333	-0.16667	1.11111
IEF	2007	ENV	69.5	64.9	77.9	71.4	71.4	1.9	4.33333
IEF	2007	ENV	77.2	81.3	73.6	74.2	76.3667	-0.83333	3.28889
IEF	2007	ENV	85.6	82.6	87.8	77.2	82.5333	-3.06667	3.55556
IEF	2007	ENV	87	85.3	89.7	83	86	-1	2.46667
IEF	2007	ENV	76.4	80	62.7	80.2	74.3	-2.1	7.73333
IEF	2007	ENV	79.4	80	77.5	80.3	79.2667	-0.13333	1.17778
IEF	2007	ENV	93	98.5	85.1	90.7	91.4333	-1.56667	4.71111
IEF	2007	ENV	83.8	81.9	82.9	73.2	79.3333	-4.46666	4.08889
IEF	2007	ENV	75.6	75.4	73.1	77.6	75.3667	-0.23333	1.51111
IEF	2007	ENV	78.4	80.8	84.8	72.1	79.2333	0.83333	4.75556
IEF	2007	ENV	76.5	78.5	74.8	75.2	76.1667	-0.333336	1.55556
IEF	2007	ENV	75.3	77.6	81.6	71.1	76.7667	1.46667	3.77778
IEF	2007	ENV	70.3	66.5	65.3	78.2	70	-0.3	5.46667
IEF	2007	ENV	84.6	83.2	80.9	80.7	81.6	-3	1.06667
IEF	2007	ENV	87.4	93.5	86.4	80.3	86.7333	-0.66667	4.51111
IEF	2007	ENV	84.9	79	74.7	82.7	78.8	-6.1	2.73333
IEF	2007	ENV	88.1	89.9	89.3	84.6	87.9333	-0.166666	2.22222
IEF	2007	ENV	79.9	80.5	76.4	84.8	80.5667	0.666666	2.82222
IEF	2007	ENV	77.7	83.7	85.5	65.6	78.2667	0.56667	8.44444
IEF	2007	ENV	82	83.5	81	75	79.8333	-2.16666	3.22222
IEF	2007	ENV	78.9	76.5	85.4	79	80.3	1.4	3.4
IEF	2007	ENV	62.5	55	65	77.4	65.8	3.3	7.73333
IEF	2007	ENV	81.8	81.6	78.3	80.3	80.0667	-1.73333	1.17778
IEF	2007	ENV	88.3	88.5	95	78	87.1667	-1.13334	6.11111
IEF	2007	ENV	77.4	79.7	74.1	77.6	77.1333	-0.26667	2.02222
IEF	2007	ENV	81.5	78.9	89.6	79.4	82.6333	1.13333	4.64444
IEF	2007	ENV	85	85.4	88.5	83.4	85.7667	0.76667	1.82222
IEF	2007	ENV	81.1	76	77.7	89.6	81.1	0	5.66667
IEF	2007	ENV	68.9	69	66.9	71.4	69.1	0.2	1.53333
IEF	2007	ENV	69.8	76.5	73.8	69	73.1	3.3	2.73333
IEF	2007	ENV	62.8	57.5	70.1	68.4	65.3333	2.53334	5.22222
IEF	2007	ENV	81.8	79	84.9	68.9	77.6	-4.2	5.8
IEF	2007	ENV	74	83.9	70.5	71.2	75.2	1.2	5.8
IEF	2007	ENV	77.6	51	90.7	73.8	71.8333	-5.76666	13.8889
IEF	2007	ENV	85.2	90.8	82.5	73.5	82.2667	-2.93333	5.84444
IEF	2007	ENV	80.5	84	83.3	69.8	79.0333	-1.46667	6.15556
IEF	2007	ENV	78.7	82.3	79.6	74.6	78.8333	0.133336	2.82222
IEF	2007	ENV	75.1	77.6	80	73.9	77.1667	2.06666	2.17778
IEF	2007	ENV	83	83.3	89	76.9	83.0667	0.066666	4.11111
IEF	2007	ENV	87.3	93.3	86	79.5	86.2667	-1.03333	4.68889
IEF	2007	ENV	94.5	95.6	83.8	82	87.1333	-7.36667	5.64444
IEF	2007	ENV	82.2	83.6	83.6	79.7	82.3	0.1	1.73333
IEF	2007	ENV	81.1	81.9	81.8	78	80.5667	-0.533334	1.71111
IEF	2007	ENV	74.7	75.2	78.9	74.6	76.2333	1.53333	1.77778
IEF	2007	ENV	75.1	76.8	69	78.5	74.7667	-0.33333	3.84444
IEF	2007	ENV	66.1	59.7	60.5	79.1	66.4333	0.333334	8.44444
IEF	2007	ENV	84	86.2	96	70.2	84.1333	0.13333	9.28889
IEF	2007	ENV	80.3	82.5	80.2	79.6	80.7667	0.46667	1.15556
IEF	2007	ENV	92.2	95.1	93.1	80.6	89.6	-2.6	6
IEF	2007	ENV	86.1	89.4	83.6	83.5	85.5	-0.6	2.6
IEF	2007	ENV	89.8	83	94.6	78	85.2	-4.6	6.26667
IEF	2007	ENV	77.6	77.5	79.5	81.2	79.4	1.8	1.26667
IEF	2007	ENV	79.9	79.7	75.8	81.5	79	-0.9	2.13333
IEF	2007	ENV	88.2	91	89.6	83.4	88	-0.2	3.06667
IEF	2007	ENV	87.1	90.5	87.7	79.5	85.9	-1.2	4.26667
IEF	2007	ENV	90.5	92.8	80.8	84	85.8667	-4.63333	4.62222
IEF	2007	ENV	73.2	64.6	76.9	79.5	73.6667	0.466664	6.04444
IEF	2007	ENV	76.3	67	86.7	79.7	77.8	1.5	7.2
IEF	2007	ENV	82.6	88.4	65.9	81.6	78.6333	-3.96667	8.48889
IEF	2007	ENV	80.9	83.1	80.7	81	81.6	0.7	1
IEF	2007	ENV	87.8	89	78.5	90.5	86	-1.8	5
IEF	2007	ENV	78.8	83.1	76	79.4	79.5	0.7	2.4
IEF	2007	ENV	74.1	71.9	68.4	80.6	73.6333	-0.46667	4.64444
IEF	2007	ENV	88.6	93.2	79.7	83.2	85.3667	-3.23333	5.22222
IEF	2007	ENV	81.8	84.6	85.3	84	84.6333	2.83333	0.444444
IEF	2007	ENV	84.6	85.9	85	84.3	85.0667	0.466666	0.555556
IEF	2007	ENV	78.9	77.7	80.9	84	80.8667	1.96667	2.11111
IEF	2007	ENV	81.9	81	85.3	79.5	81.9333	0.033334	2.24444
IEF	2007	ENV	78.8	85.5	70.8	79	78.4333	-0.366666	5.08889
IEF	2007	ENV	76.8	83.6	58.5	78.3	73.4667	-3.33333	9.97778
IEF	2007	ENV	81.1	60	82	93.4	78.4667	-2.63333	12.3111
IEF	2007	ENV	77.3	75.9	68.9	87.3	77.3667	0.06667	6.62222
IEF	2007	ENV	90.2	88.3	88.9	90.5	89.2333	-0.96667	0.844444
IEF	2007	ENV	79.8	87	75.1	78.4	80.1667	0.366664	4.55556
IEF	2007	ENV	81.3	82.6	84.9	78.9	82.1333	0.83333	2.15556
IEF	2007	ENV	82.9	83.2	78.4	85.4	82.3333	-0.566664	2.62222
IEF	2007	ENV	83.2	77.5	88.2	79.1	81.6	-1.6	4.4
IEF	2007	ENV	73.6	64.9	78	79.3	74.0667	0.466666	6.11111
IEF	2007	ENV	88.9	86.2	93	84.8	88	-0.9	3.33333
IEF	2007	ENV	72.4	73.9	74.1	71.5	73.1667	0.766664	1.11111
IEF	2007	ENV	90.5	93.9	91.9	79.4	88.4	-2.1	6
IEF	2007	ENV	82.9	85.5	87.2	78.2	83.6333	0.73333	3.62222
IEF	2007	ENV	87.3	91	91.8	78.7	87.1667	-0.133336	5.64444
IEF	2007	ENV	81.7	77.3	91.1	76.2	81.5333	-0.16667	6.37778
IEF	2007	ENV	86.2	86.3	88.8	81	85.3667	-0.83333	2.91111
IEF	2007	ENV	81	79.1	82	84.5	81.8667	0.86667	1.84444
IEF	2007	ENV	85.4	87.5	89.3	81.1	85.9667	0.56667	3.24444
IEF	2007	ENV	87.3	80.5	92.9	82.4	85.2667	-2.03333	5.08889
IEF	2007	ENV	79.2	84.1	69.5	81.4	78.3333	-0.866664	5.88889
IEF	2007	ENV	69.6	63	66.1	81.4	70.1667	0.566664	7.48889
IEF	2007	ENV	82.5	89.1	76.7	80.7	82.1667	-0.333336	4.62222
IEF	2007	ENV	83.5	81.2	87.6	84	84.2667	0.76667	2.22222
IEF	2007	ENV	78.4	76.3	75	83.5	78.2667	-0.13333	3.48889
IEF	2007	ENV	78.2	76	75.2	82.2	77.8	-0.4	2.93333
IEF	2007	ENV	78.1	79.5	72.5	85	79	0.9	4.33333
IEF	2007	ENV	81.4	75.9	85	86.1	82.3333	0.933336	4.28889
IEF	2007	ENV	92.6	97.7	86	85.5	89.7333	-2.86667	5.31111
IEF	2007	ENV	85.8	89.2	84.5	85.4	86.3667	0.56667	1.88889
IEF	2007	ENV	89	87	91.9	87.6	88.8333	-0.166664	2.04444
IEF	2007	ENV	83.2	75.2	89.4	84.8	83.1333	-0.06667	5.28889
IEF	2007	ENV	81.7	78.2	77.4	92.1	82.5667	0.866666	6.35556
IEF	2007	ENV	85.8	92.2	80.6	81	84.6	-1.2	5.06667
IEF	2007	ENV	81.8	84.1	79.8	81.6	81.8333	0.033336	1.51111
IEF	2007	ENV	86.3	80	86.6	83.2	83.2667	-3.03333	2.22222
IEF	2007	ENV	79	68.5	84.7	81.1	78.1	-0.9	6.4
IEF	2007	ENV	79.8	88.5	67.7	83.6	79.9333	0.133334	8.15556
IEF	2007	ENV	85.4	86.6	88.1	85.2	86.6333	1.23333	0.977778
IEF	2007	ENV	80.7	74.7	82.5	87.7	81.6333	0.93333	4.62222
IEF	2007	ENV	88.9	89.7	88.1	88	88.6	-0.3	0.733333
IEF	2007	ENV	86.1	81.2	90.8	86	86	-0.1	3.2
IEF	2007	ENV	86.6	86.2	90.5	84.9	87.2	0.6	2.2
IEF	2007	ENV	64.8	49.5	78.4	86.6	71.5	6.7	14.6667
IEF	2007	ENV	87.4	96.8	78.5	87.3	87.5333	0.13333	6.17778
IEF	2007	ENV	82.4	80.7	81.5	87.1	83.1	0.7	2.66667
IEF	2007	ENV	86.5	90.8	77.8	90.9	86.5	0	5.8
IEF	2007	ENV	88.7	94	84.1	88.6	88.9	0.2	3.4
IEF	2007	ENV	86.6	88.3	83.7	87.3	86.4333	-0.166666	1.82222
IEF	2007	ENV	79.9	84.1	77	79.3	80.1333	0.23333	2.64444
IEF	2007	ENV	85.1	90.2	82	83.6	85.2667	0.16667	3.28889
IEF	2007	ENV	73.7	59	84.1	78.7	73.9333	0.233334	9.95556
IEF	2007	ENV	70.7	73.8	59.5	79	70.7667	0.06667	7.51111
IEF	2007	ENV	81	77	81.9	81	79.9667	-1.03333	1.97778
IEF	2007	ENV	91	91.3	94.1	81.4	88.9333	-2.06667	5.02222
IEF	2007	ENV	86.8	80.3	94.6	87	87.3	0.5	4.86667
IEF	2007	ENV	75.9	89.7	66.5	80.1	78.7667	2.86667	8.17778
IEF	2007	ENV	88.9	88.7	86.2	88.7	87.8667	-1.03333	1.11111
IEF	2007	ENV	86.1	89.5	83.7	87.8	87	0.9	2.2
IEF	2007	ENV	85.9	79.8	86.6	90	85.4667	-0.43333	3.77778
IEF	2007	ENV	87.7	81.7	89.1	91.6	87.4667	-0.23333	3.84444
IEF	2007	ENV	87.8	88.4	76.8	88.2	84.4667	-3.33333	5.11111
IEF	2007	ENV	89.3	92.2	85.1	88.8	88.7	-0.6	2.4
IEF	2007	ENV	78.5	81.6	79.5	72.3	77.8	-0.7	3.66667
IEF	2007	ENV	81.2	76.2	83	83	80.7333	-0.46667	3.02222
IEF	2007	ENV	83.4	84	83.1	84	83.7	0.3	0.4
IEF	2007	ENV	77.8	83.5	70.9	83.5	79.3	1.5	5.6
IEF	2007	ENV	60	81.9	45	87.5	71.4667	11.4667	17.6444
IEF	2007	ENV	87.1	86.3	88.2	85.4	86.6333	-0.46667	1.04444
IEF	2007	ENV	88.6	91.1	84.8	88.8	88.2333	-0.36667	2.28889
IEF	2007	ENV	88.9	78.4	86.2	84.7	83.1	-5.8	3.13333
IEF	2007	ENV	80.8	72.7	80.5	83.8	79	-1.8	4.2
IEF	2007	ENV	81	84.5	77.3	82.9	81.5667	0.566666	2.84444
IEF	2007	ENV	69.2	69.9	61.3	82	71.0667	1.86667	7.28889
IEF	2007	ENV	83.9	88.1	71.4	88.1	82.5333	-1.36667	7.42222
IEF	2007	ENV	82.2	71.9	92.6	87.8	84.1	1.9	8.13333
IEF	2007	ENV	92	92.4	85	91.5	89.6333	-2.36667	3.08889
IEF	2007	ENV	85.2	92.7	75.3	86.7	84.9	-0.3	6.4
IEF	2007	ENV	87.1	86.9	87	88.3	87.4	0.3	0.6
IEF	2007	ENV	82.5	93.4	78	92.5	87.9667	5.46667	6.64444
IEF	2007	ENV	87.7	87.3	81	87.3	85.2	-2.5	2.8
IEF	2007	ENV	88.2	87.4	81.4	90.1	86.3	-1.9	3.26667
IEF	2007	ENV	84.5	86.7	77.5	89.8	84.6667	0.166664	4.77778
IEF	2007	ENV	88.2	77	83.5	92.1	84.2	-4	5.26667
IEF	2007	ENV	82.4	82.5	65.6	92.9	80.3333	-2.06666	9.82222
IEF	2007	ENV	83.6	64.1	85.9	90.1	80.0333	-3.56667	10.6222
IEF	2007	ENV	92.1	84.4	93.6	95	91	-1.1	4.4
IEF	2007	ENV	91.2	77.7	95.5	93.5	88.9	-2.3	7.46667
IEF	2007	ENV	79.5	66	82.3	74.8	74.3667	-5.13333	5.57778
IEF	2007	ENV	85.2	94.6	83.1	88.8	88.8333	3.63334	3.84444
IEF	2007	ENV	81.9	79.3	83	84.3	82.2	0.3	1.93333
IEF	2007	ENV	91	82.5	97.2	86.8	88.8333	-2.16666	5.57778
IEF	2007	ENV	84	77.9	84.2	87.9	83.3333	-0.666664	3.62222
IEF	2007	ENV	87.5	84.1	87.5	89.1	86.9	-0.6	1.86667
IEF	2007	ENV	89.9	86.9	91.8	90.2	89.6333	-0.26667	1.82222
IEF	2007	ENV	85.3	83.5	89	84.8	85.7667	0.46667	2.15556
IEF	2007	ENV	76.3	70.3	72.3	89.2	77.2667	0.96667	7.95556
IEF	2007	ENV	73.2	76.3	59.5	91.2	75.6667	2.46666	10.7778
IEF	2007	ENV	86.1	87.4	79.5	90.8	85.9	-0.2	4.26667
IEF	2007	ENV	71.4	40.5	76.8	88.5	68.6	-2.8	18.7333
IEF	2007	ENV	85.8	69.5	85.9	93.8	83.0667	-2.73333	9.04444
IEF	2007	ENV	83.8	86.2	92.5	72.6	83.7667	-0.03333	7.44444
IEF	2007	ENV	88.8	87.1	99.4	86.5	91	2.2	5.6
IEF	2007	ENV	74	73.5	64.8	88.4	75.5667	1.56667	8.55556
IEF	2007	ENV	84.5	81.8	84.1	90.4	85.4333	0.933334	3.31111
IEF	2007	ENV	85.7	84	78.1	91.1	84.4	-1.3	4.46667
IEF	2007	ENV	82.6	71.8	82.5	88.6	80.9667	-1.63333	6.11111
IEF	2007	ENV	85.3	89.5	86.3	88.6	88.1333	2.83333	1.22222
IEF	2007	ENV	83.7	79.8	84.3	87.4	83.8333	0.133336	2.68889
IEF	2007	ENV	60.9	49.5	81.9	90.4	73.9333	13.0333	16.2889
IEF	2007	ENV	91.5	84.5	94.9	91.4	90.2667	-1.23333	3.84444
IEF	2007	ENV	79	74.6	72.8	89.7	79.0333	0.03333	7.11111
IEF	2007	ENV	84.6	81.9	69.1	93.8	81.6	-3	8.33333
IEF	2007	ENV	81.3	76	82.2	81.6	79.9333	-1.36667	2.62222
IEF	2007	ENV	83.1	69.7	95.4	82.8	82.6333	-0.46667	8.62222
IEF	2007	ENV	72.1	34.5	78.8	83.4	65.5667	-6.53333	20.7111
IEF	2007	ENV	86.6	77.5	89.6	84.1	83.7333	-2.86667	4.15556
IEF	2007	ENV	86.6	93.6	77.5	87.7	86.2667	-0.33333	5.84444
IEF	2007	ENV	81.1	79.6	77.1	89.1	81.9333	0.833334	4.77778
IEF	2007	ENV	92.4	90.2	87.4	96.1	91.2333	-1.16667	3.24444
IEF	2007	ENV	93.9	90.5	85.4	95.6	90.5	-3.4	3.4
IEF	2007	ENV	85.7	83.5	83.1	92.2	86.2667	0.56667	3.95556
IEF	2007	ENV	85.5	78.2	90.7	89.4	86.1	0.6	5.26667
IEF	2007	ENV	82.6	82.6	70.5	88.2	80.4333	-2.16667	6.62222
IEF	2007	ENV	91.7	96.8	86.1	90.4	91.1	-0.6	3.8
IEF	2007	ENV	85	79.5	83	91.1	84.5333	-0.46667	4.37778
IEF	2007	ENV	89.1	90	80.2	95.3	88.5	-0.6	5.53333
IEF	2007	ENV	91.6	85.8	91.8	96.3	91.3	-0.3	3.66667
IEF	2007	ENV	91	97.9	86.5	96.8	93.7333	2.73333	4.82222
IEF	2007	ENV	91.1	92.8	81.9	97.4	90.7	-0.4	5.86667
IEF	2007	ENV	81.9	88.3	72.7	85.6	82.2	0.3	6.33333
IEF	2007	ENV	91.7	91.4	93.4	92.8	92.5333	0.83333	0.755556
IEF	2007	ENV	88.3	81	90	94.6	88.5333	0.23333	5.02222
IEF	2007	ENV	95	81.6	86.6	96.8	88.3333	-6.66666	5.64444
IEF	2007	ENV	82.9	79.7	81	84.4	81.7	-1.2	1.8
IEF	2007	ENV	89.3	70.5	87.6	96.6	84.9	-4.4	9.6
IEF	2007	ENV	80.3	82.8	78.9	91.8	84.5	4.2	4.86667
IEF	2007	ENV	92.2	84.8	90.9	100	91.9	-0.3	5.4
IEF	2007	ENV	94.9	83.9	96.8	99	93.2333	-1.66667	6.22222
IEF	2007	LIF	19	5	23	23	17	-2	8
IEF	2007	LIF	9	5	31	10	15.3333	6.33333	10.4444
IEF	2007	LIF	21	67	2.5	19.5	29.6667	8.66667	24.8889
IEF	2007	LIF	60.5	60.5	77	42.9	60.1333	-0.366665	11.4889
IEF	2007	LIF	54.2	71.1	51	40	54.0333	-0.166667	11.3778
IEF	2007	LIF	55	48.5	60.2	58.4	55.7	0.7	4.8
IEF	2007	LIF	72.4	70.2	91.5	51.2	70.9667	-1.43333	13.6889
IEF	2007	LIF	70.5	82.8	68.1	48.5	66.4667	-4.03333	11.9778
IEF	2007	LIF	71.8	73.5	76.4	64.9	71.6	-0.2	4.46667
IEF	2007	LIF	90.8	82.4	92.8	64	79.7333	-11.0667	10.4889
IEF	2007	LIF	53.8	84.1	41	55	60.0333	6.23333	16.0444
IEF	2007	LIF	63	80.3	62.2	48.8	63.7667	0.766666	11.0222
IEF	2007	LIF	61.6	79.1	56	55.2	63.4333	1.83333	10.4444
IEF	2007	LIF	57	81.7	52	53	62.2333	5.23333	12.9778
IEF	2007	LIF	78.2	78	86.9	56	73.6333	-4.56667	11.7556
IEF	2007	LIF	63.1	70.9	66.5	53.6	63.6667	0.566668	6.71111
IEF	2007	LIF	65.2	74.5	66	52	64.1667	-1.03334	8.11111
IEF	2007	LIF	71.1	82.8	74.4	59.5	72.2333	1.13333	8.48889
IEF	2007	LIF	70.3	75.1	90.9	53.1	73.0333	2.73333	13.2889
IEF	2007	LIF	73.2	75.2	67.6	67	69.9333	-3.26667	3.51111
IEF	2007	LIF	84.3	91	83.2	70.3	81.5	-2.8	7.46667
IEF	2007	LIF	79.3	79.2	77.6	62.8	73.2	-6.1	6.93333
IEF	2007	LIF	73.9	82	80.5	58.3	73.6	-0.3	10.2
IEF	2007	LIF	73.6	68.3	85.5	51.8	68.5333	-5.06667	11.3111
IEF	2007	LIF	76.7	67	86.7	72.6	75.4333	-1.26667	7.51111
IEF	2007	LIF	67.7	58.3	67.5	70.6	65.4667	-2.23333	4.77778
IEF	2007	LIF	63	55.3	77.8	50	61.0333	-1.96667	11.1778
IEF	2007	LIF	69.9	93.3	60.8	53.5	69.2	-0.7	16.0667
IEF	2007	LIF	84.8	88.5	86.6	60.9	78.6667	-6.13334	11.8444
IEF	2007	LIF	83.2	85	89.7	59.9	78.2	-5	12.2
IEF	2007	LIF	50	51.9	51.9	54	52.6	2.6	0.933333
IEF	2007	LIF	79.9	81.7	84.1	74.3	80.0333	0.13333	3.82222
IEF	2007	LIF	78.1	84.7	79.3	70	78	-0.1	5.33333
IEF	2007	LIF	69.8	83.9	71.5	65	73.4667	3.66667	6.95556
IEF	2007	LIF	74.8	73.3	88.2	67.1	76.2	1.4	8
IEF	2007	LIF	74.5	84.3	76.5	68.5	76.4333	1.93333	5.28889
IEF	2007	LIF	76.8	86.7	77	67	76.9	0.1	6.6
IEF	2007	LIF	83.4	83	97.8	71.9	84.2333	0.83333	9.04444
IEF	2007	LIF	70.2	74.6	86.6	56.5	72.5667	2.36667	10.7111
IEF	2007	LIF	67	70.6	60	64.9	65.1667	-1.83334	3.62222
IEF	2007	LIF	82.4	82.2	83.6	75.4	80.4	-2	3.33333
IEF	2007	LIF	76.8	84.7	75.3	63.4	74.4667	-2.33333	7.37778
IEF	2007	LIF	86.4	82	88.2	76.9	82.3667	-4.03333	3.88889
IEF	2007	LIF	79.7	86.4	78.8	71.1	78.7667	-0.93333	5.11111
IEF	2007	LIF	84.3	91.1	83.6	68.5	81.0667	-3.23333	8.37778
IEF	2007	LIF	80.3	80.3	78.1	75.9	78.1	-2.2	1.46667
IEF	2007	LIF	76.2	82.3	77	71.1	76.8	0.6	3.8
IEF	2007	LIF	81.4	85.7	91.5	78	85.0667	3.66667	4.71111
IEF	2007	LIF	75.1	60.8	86.1	78.9	75.2667	0.16667	9.64444
IEF	2007	LIF	80.3	84.1	74.8	83.4	80.7667	0.46667	3.97778
IEF	2007	LIF	73.4	74	83.9	63.4	73.7667	0.36667	6.91111
IEF	2007	LIF	67.2	66.3	90.8	56.3	71.1333	3.93333	13.1111
IEF	2007	LIF	82.9	82.9	93.7	69.3	81.9667	-0.93333	8.44444
IEF	2007	LIF	79.4	78.8	85.3	74.4	79.5	0.1	3.86667
IEF	2007	LIF	74.5	80.4	72.2	72	74.8667	0.36667	3.68889
IEF	2007	LIF	64.6	66.6	71.5	59	65.7	1.1	4.46667
IEF	2007	LIF	61.2	57.7	60	66.7	61.4667	0.266667	3.48889
IEF	2007	LIF	72.7	62.6	89.7	61.8	71.3667	-1.33333	12.2222
IEF	2007	LIF	71.6	90.7	71.6	68	76.7667	5.16667	9.28889
IEF	2007	LIF	62	49.4	73.7	64.7	62.6	0.6	8.8
IEF	2007	LIF	69.5	69	70.7	68.7	69.4667	-0.03333	0.822222
IEF	2007	LIF	78.3	82.9	75.1	76.3	78.1	-0.2	3.2
IEF	2007	LIF	82.8	97.5	85.8	71.3	84.8667	2.06667	9.04444
IEF	2007	LIF	88.6	91.8	93.6	66.5	83.9667	-4.63333	11.6444
IEF	2007	LIF	59.9	54.5	55	70.5	60	0.1	7
IEF	2007	LIF	76.5	71.6	85.9	78.6	78.7	2.2	4.8
IEF	2007	LIF	78.9	67.1	99.1	80.7	82.3	3.4	11.2
IEF	2007	LIF	78.1	72.4	83.1	77.7	77.7333	-0.36667	3.57778
IEF	2007	LIF	76.5	49.2	80.4	84.2	71.2667	-5.23333	14.7111
IEF	2007	LIF	79.4	90.4	91.5	68.6	83.5	4.1	9.93333
IEF	2007	LIF	82.4	93.3	86.9	65.2	81.8	-0.6	11.0667
IEF	2007	LIF	69.3	75.1	61.5	70.9	69.1667	-0.133336	5.11111
IEF	2007	LIF	67.3	55	84	73.5	70.8333	3.53334	10.5556
IEF	2007	LIF	82.3	79.5	85.2	68.8	77.8333	-4.46666	6.02222
IEF	2007	LIF	78	86.4	72.4	75.6	78.1333	0.13333	5.51111
IEF	2007	LIF	90.5	78.8	92.5	75.7	82.3333	-8.16666	6.77778
IEF	2007	LIF	79.6	87.9	79.9	69	78.9333	-0.666666	6.62222
IEF	2007	LIF	83	90	82.3	80.2	84.1667	1.16666	3.88889
IEF	2007	LIF	84.1	94.3	78.1	76.1	82.8333	-1.26666	7.64444
IEF	2007	LIF	74.4	78.2	71.2	69.8	73.0667	-1.33333	3.42222
IEF	2007	LIF	78.9	77	91.1	70.9	79.6667	0.766664	7.62222
IEF	2007	LIF	77.1	67.5	96	74.1	79.2	2.1	11.2
IEF	2007	LIF	64.6	68.1	88.9	76	77.6667	13.0667	7.48889
IEF	2007	LIF	75.2	78.2	65.1	72.2	71.8333	-3.36666	4.48889
IEF	2007	LIF	84.9	96	75.4	77.9	83.1	-1.8	8.6
IEF	2007	LIF	76.6	94	68.9	78.8	80.5667	3.96667	8.95556
IEF	2007	LIF	69.9	65	76.1	64.5	68.5333	-1.36667	5.04444
IEF	2007	LIF	65.3	66.7	62	66.9	65.2	-0.1	2.13333
IEF	2007	LIF	68.9	70.5	72.3	61.6	68.1333	-0.76667	4.35556
IEF	2007	LIF	87.1	83.5	93	76.5	84.3333	-2.76666	5.77778
IEF	2007	LIF	77	74	83.8	67	74.9333	-2.06667	5.91111
IEF	2007	LIF	85.1	88.5	89	70.6	82.7	-2.4	8.06667
IEF	2007	LIF	63	34.9	74	66.5	58.4667	-4.53333	15.7111
IEF	2007	LIF	63	59.5	62.7	66.4	62.8667	-0.133335	2.35556
IEF	2007	LIF	74	82.7	71.5	70.9	75.0333	1.03333	5.11111
IEF	2007	LIF	63.7	48.3	70.9	71.7	63.6333	-0.066665	10.2222
IEF	2007	LIF	72.5	74	71	72.4	72.4667	-0.03333	1.02222
IEF	2007	LIF	72.6	66.8	71.1	75.9	71.2667	-1.33333	3.08889
IEF	2007	LIF	72.3	66.7	70.5	77.7	71.6333	-0.66667	4.04444
IEF	2007	LIF	73	70.1	76.3	73.9	73.4333	0.433334	2.22222
IEF	2007	LIF	79.4	81	83.6	73	79.2	-0.2	4.13333
IEF	2007	LIF	86.4	93.9	81.9	78.1	84.6333	-1.76667	6.17778
IEF	2007	LIF	80.7	81.9	77.4	75	78.1	-2.6	2.53333
IEF	2007	LIF	90.2	89.3	94.8	75.3	86.4667	-3.73333	7.44444
IEF	2007	LIF	85.4	95.4	80.5	75.5	83.8	-1.6	7.73333
IEF	2007	LIF	88	92.7	96.1	77	88.6	0.6	7.73333
IEF	2007	LIF	72.4	84.2	55.9	74.4	71.5	-0.9	10.4
IEF	2007	LIF	77.8	88.2	76	73.6	79.2667	1.46667	5.95556
IEF	2007	LIF	87.3	92.4	91.5	76	86.6333	-0.66667	7.08889
IEF	2007	LIF	79.3	84.1	70.8	76	76.9667	-2.33333	4.75556
IEF	2007	LIF	76.1	80.7	75.8	66.5	74.3333	-1.76666	5.22222
IEF	2007	LIF	80.4	80.1	88.5	75.5	81.3667	0.96667	4.75556
IEF	2007	LIF	88.8	99.5	84.6	82.5	88.8667	0.06667	7.08889
IEF	2007	LIF	79.7	87.9	78.3	78.3	81.5	1.8	4.26667
IEF	2007	LIF	84.8	87.5	83.7	74.4	81.8667	-2.93333	4.97778
IEF	2007	LIF	76.6	75.1	58	87	73.3667	-3.23333	10.2444
IEF	2007	LIF	74	75.6	51.5	78.9	68.6667	-5.33334	11.4444
IEF	2007	LIF	89.8	95.2	85.8	82	87.6667	-2.13334	5.02222
IEF	2007	LIF	69.1	86.7	81	72.2	79.9667	10.8667	5.17778
IEF	2007	LIF	77	81.8	78.9	70.9	77.2	0.2	4.2
IEF	2007	LIF	84.3	81.9	90.7	83	85.2	0.9	3.66667
IEF	2007	LIF	82.7	83.3	86.2	76.5	82	-0.7	3.66667
IEF	2007	LIF	76.9	83.7	76	76.4	78.7	1.8	3.33333
IEF	2007	LIF	89	89.7	89.3	81	86.6667	-2.33334	3.77778
IEF	2007	LIF	72.7	81.2	64	73	72.7333	0.03333	5.82222
IEF	2007	LIF	86.4	85.1	91.2	83.2	86.5	0.1	3.13333
IEF	2007	LIF	83.3	85.6	76.8	84.8	82.4	-0.9	3.73333
IEF	2007	LIF	77	62.6	84.2	82.1	76.3	-0.7	9.13333
IEF	2007	LIF	69.3	80.9	65.5	67.7	71.3667	2.06667	6.35556
IEF	2007	LIF	88.6	92.9	91	71.1	85	-3.6	9.26667
IEF	2007	LIF	76.6	99.6	76.6	70.6	82.2667	5.66667	11.5556
IEF	2007	LIF	82	83.9	94.4	76.3	84.8667	2.86667	6.35556
IEF	2007	LIF	75.4	75.9	75.5	74.4	75.2667	-0.13333	0.577778
IEF	2007	LIF	74	70.6	76.5	73.8	73.6333	-0.36667	2.02222
IEF	2007	LIF	82.3	89.9	79	82.1	83.6667	1.36666	4.15556
IEF	2007	LIF	83.7	83.3	83.6	81.6	82.8333	-0.866664	0.822222
IEF	2007	LIF	89.2	92.5	88.3	82.4	87.7333	-1.46667	3.55556
IEF	2007	LIF	88.5	93.5	83.3	83.2	86.6667	-1.83334	4.55556
IEF	2007	LIF	79.7	72.6	81.5	83.4	79.1667	-0.533336	4.37778
IEF	2007	LIF	83.9	77.8	94	75.5	82.4333	-1.46667	7.71111
IEF	2007	LIF	60.4	65.2	63.9	47.7	58.9333	-1.46667	7.48889
IEF	2007	LIF	84.7	81.5	85.9	80.2	82.5333	-2.16667	2.24444
IEF	2007	LIF	84.6	92	84.4	77.7	84.7	0.1	4.86667
IEF	2007	LIF	85.9	97.3	86.1	78.9	87.4333	1.53333	6.57778
IEF	2007	LIF	80.4	80.8	79.7	80.5	80.3333	-0.066664	0.422222
IEF	2007	LIF	76.8	73.4	80.3	76.3	76.6667	-0.133336	2.42222
IEF	2007	LIF	76.1	76.3	71.3	77.2	74.9333	-1.16667	2.42222
IEF	2007	LIF	81	82	82.4	79.7	81.3667	0.36667	1.11111
IEF	2007	LIF	76.4	74.5	69.5	78.1	74.0333	-2.36667	3.02222
IEF	2007	LIF	83.7	90.7	79.6	79.6	83.3	-0.4	4.93333
IEF	2007	LIF	81.8	71.6	93.9	78.2	81.2333	-0.56667	8.44444
IEF	2007	LIF	72.5	88.3	53	79.6	73.6333	1.13333	13.7556
IEF	2007	LIF	73.3	67.7	73.9	73.7	71.7667	-1.53333	2.71111
IEF	2007	LIF	82.6	78.2	87.6	80.1	81.9667	-0.63333	3.75556
IEF	2007	LIF	77.1	70.5	76.4	81.8	76.2333	-0.86667	3.82222
IEF	2007	LIF	84.6	83.1	90.2	77.6	83.6333	-0.96667	4.37778
IEF	2007	LIF	84	76.5	90.1	84.7	83.7667	-0.23333	4.84444
IEF	2007	LIF	86	85.8	94.5	80.7	87	1	5
IEF	2007	LIF	81.2	74.2	88.8	84.3	82.4333	1.23333	5.48889
IEF	2007	LIF	79.6	70.2	90.1	80.2	80.1667	0.566664	6.64444
IEF	2007	LIF	93.2	99	83.9	80.7	87.8667	-5.33333	7.42222
IEF	2007	LIF	84.6	81.1	91.9	84	85.6667	1.06666	4.15556
IEF	2007	LIF	80.8	86.7	72.7	82.6	80.6667	-0.133336	5.31111
IEF	2007	LIF	92.1	92.1	97.1	79.4	89.5333	-2.56667	6.75556
IEF	2007	LIF	70.6	69.8	74.5	87	77.1	6.5	6.6
IEF	2007	LIF	83.5	94	68.4	82.2	81.5333	-1.96667	8.75556
IEF	2007	LIF	91.3	93.4	96.4	80.3	90.0333	-1.26667	6.48889
IEF	2007	LIF	75.2	81.7	46.5	80	69.4	-5.8	15.2667
IEF	2007	LIF	76.5	82.1	68.9	79.7	76.9	0.4	5.33333
IEF	2007	LIF	87.8	88.3	75.1	80.9	81.4333	-6.36667	4.57778
IEF	2007	LIF	81.3	88.2	74	85.2	82.4667	1.16667	5.64444
IEF	2007	LIF	79.7	83.1	65.7	72.3	73.7	-6	6.26667
IEF	2007	LIF	81.4	94.3	81.4	76.7	84.1333	2.73333	6.77778
IEF	2007	LIF	73.3	73.6	72	75.1	73.5667	0.266666	1.04444
IEF	2007	LIF	75.2	79.2	69	73.4	73.8667	-1.33333	3.55556
IEF	2007	LIF	69.1	63.6	64	74.1	67.2333	-1.86667	4.57778
IEF	2007	LIF	74.1	86.2	64.5	76.2	75.6333	1.53333	7.42222
IEF	2007	LIF	68.1	69.5	51.1	76.5	65.7	-2.4	9.73333
IEF	2007	LIF	72.2	59.4	84.2	74.5	72.7	0.5	8.86667
IEF	2007	LIF	87.2	89.7	88.5	79	85.7333	-1.46667	4.48889
IEF	2007	LIF	83.1	82.9	86.8	79.7	83.1333	0.03333	2.44444
IEF	2007	LIF	86.5	88.6	96.5	79.6	88.2333	1.73333	5.75556
IEF	2007	LIF	66.6	62.5	52.5	78.9	64.6333	-1.96667	9.51111
IEF	2007	LIF	84.9	84.6	94.3	80.1	86.3333	1.43334	5.31111
IEF	2007	LIF	86.5	79.7	95.6	79	84.7667	-1.73333	7.22222
IEF	2007	LIF	72.5	80.5	55.9	79.8	72.0667	-0.433334	10.7778
IEF	2007	LIF	80	84	72	80.3	78.7667	-1.23333	4.51111
IEF	2007	LIF	87.2	87.1	91	82.8	86.9667	-0.23333	2.77778
IEF	2007	LIF	85.7	84.9	84.1	87.6	85.5333	-0.16667	1.37778
IEF	2007	LIF	81	86.4	73.5	86.2	82.0333	1.03333	5.68889
IEF	2007	LIF	78.4	78.1	63.5	86.6	76.0667	-2.33333	8.37778
IEF	2007	LIF	67.2	79.7	63	58.5	67.0667	-0.133334	8.42222
IEF	2007	LIF	70.8	71.9	65.2	63.6	66.9	-3.9	3.33333
IEF	2007	LIF	85.8	80.8	92.8	76.2	83.2667	-2.53333	6.35556
IEF	2007	LIF	74.3	83.7	75.8	71.4	76.9667	2.66667	4.48889
IEF	2007	LIF	72	67.5	77.5	69.9	71.6333	-0.36667	3.91111
IEF	2007	LIF	77.8	72.5	82.9	69.4	74.9333	-2.86667	5.31111
IEF	2007	LIF	75.9	60.5	83.5	75.9	73.3	-2.6	8.53333
IEF	2007	LIF	80.8	71.8	84.2	78.5	78.1667	-2.63334	4.24444
IEF	2007	LIF	83.3	80.5	89	77	82.1667	-1.13334	4.55556
IEF	2007	LIF	87	93.3	77.5	76	82.2667	-4.73333	7.35556
IEF	2007	LIF	69.7	58.9	81.6	69	69.8333	0.133336	7.84444
IEF	2007	LIF	85.7	89.1	84.2	81.5	84.9333	-0.766666	2.77778
IEF	2007	LIF	74.8	77.1	74.4	74.6	75.3667	0.56667	1.15556
IEF	2007	LIF	83.3	86.1	79.4	79.1	81.5333	-1.76667	3.04444
IEF	2007	LIF	72.7	64	83.4	73.9	73.7667	1.06667	6.51111
IEF	2007	LIF	83.8	86.8	84.3	81.4	84.1667	0.366664	1.84444
IEF	2007	LIF	79.1	76.9	82	78.1	79	-0.1	2
IEF	2007	LIF	76.3	73.5	80.5	79.1	77.7	1.4	2.8
IEF	2007	LIF	69.6	61	65.4	81.5	69.3	-0.3	8.13333
IEF	2007	LIF	77.8	77.9	78	76.9	77.6	-0.2	0.466667
IEF	2007	LIF	88.6	87.8	89.6	82.1	86.5	-2.1	2.93333
IEF	2007	LIF	81.9	92.5	75.3	81.5	83.1	1.2	6.26667
IEF	2007	LIF	80.9	80.3	82.4	80.1	80.9333	0.033334	0.977778
IEF	2007	LIF	84	83.5	86	81	83.5	-0.5	1.66667
IEF	2007	LIF	84.6	88.4	83.3	82	84.5667	-0.033334	2.55556
IEF	2007	LIF	90.8	88.5	95	83.4	88.9667	-1.83333	4.02222
IEF	2007	LIF	82.5	75	89.5	82	82.1667	-0.333336	4.88889
IEF	2007	LIF	81	74.1	88.2	83	81.7667	0.76667	5.11111
IEF	2007	LIF	77.7	69.7	84	79.9	77.8667	0.16667	5.44444
IEF	2007	LIF	80	71.7	87.8	82.1	80.5333	0.53333	5.88889
IEF	2007	LIF	81.5	90.8	67.1	81.1	79.6667	-1.83334	8.37778
IEF	2007	LIF	71.5	59.4	67.1	83.6	70.0333	-1.46667	9.04444
IEF	2007	LIF	82.6	96	67.9	84.2	82.7	0.1	9.86667
IEF	2007	LIF	83.2	83.3	85.6	81.3	83.4	0.2	1.46667
IEF	2007	LIF	82.1	87.3	81.3	85.7	84.7667	2.66667	2.31111
IEF	2007	LIF	79.6	75.2	78.6	83.4	79.0667	-0.533334	2.88889
IEF	2007	LIF	68.5	61.5	69	82.9	71.1333	2.63333	7.84444
IEF	2007	LIF	89.8	67.9	98	80.5	82.1333	-7.66667	10.5778
IEF	2007	LIF	84.5	82.8	85	82.5	83.4333	-1.06667	1.04444
IEF	2007	LIF	86.6	85.4	87.9	83	85.4333	-1.16667	1.64444
IEF	2007	LIF	79.3	75.8	80.6	80.5	78.9667	-0.33333	2.11111
IEF	2007	LIF	77.5	77	69.6	81	75.8667	-1.63333	4.17778
IEF	2007	LIF	82.8	86.7	88.1	72.4	82.4	-0.4	6.66667
IEF	2007	LIF	84.9	82.2	96	79.8	86	1.1	6.66667
IEF	2007	LIF	80.8	74.1	86.9	80.5	80.5	-0.3	4.26667
IEF	2007	LIF	82.3	77.8	90.2	75.5	81.1667	-1.13334	6.02222
IEF	2007	LIF	77.2	64.4	84.6	79.2	76.0667	-1.13333	7.77778
IEF	2007	LIF	83.7	85.5	78	82.8	82.1	-1.6	2.73333
IEF	2007	LIF	73.4	64.5	71.4	75.3	70.4	-3	3.93333
IEF	2007	LIF	94.4	96.5	98.7	87.2	94.1333	-0.26667	4.62222
IEF	2007	LIF	83.9	74.9	93.3	85.1	84.4333	0.533334	6.35556
IEF	2007	LIF	86.3	90	84.4	83.1	85.8333	-0.466664	2.77778
IEF	2007	LIF	94	94.1	93.4	85	90.8333	-3.16666	3.88889
IEF	2007	LIF	81.7	76.2	91.1	83.9	83.7333	2.03333	5.02222
IEF	2007	LIF	85.3	70.6	91.7	86.1	82.8	-2.5	8.13333
IEF	2007	LIF	84	94.6	63.2	86	81.2667	-2.73333	12.0444
IEF	2007	LIF	91.8	92	88.3	85.6	88.6333	-3.16667	2.24444
IEF	2007	LIF	84.3	80.8	96.4	83.2	86.8	2.5	6.4
IEF	2007	LIF	78.9	51	91.1	86.8	76.3	-2.6	16.8667
IEF	2007	LIF	69.7	79.8	87.2	84.5	83.8333	14.1333	2.68889
IEF	2007	LIF	78.7	73.4	79.5	81.4	78.1	-0.6	3.13333
IEF	2007	LIF	83.7	77.1	87.5	83.2	82.6	-1.1	3.66667
IEF	2007	LIF	78.3	93.2	64	83.5	80.2333	1.93333	10.8222
IEF	2007	LIF	82.1	86.2	66.1	84.6	78.9667	-3.13333	8.57778
IEF	2007	LIF	77.4	75.4	82.6	70.5	76.1667	-1.23334	4.28889
IEF	2007	LIF	83.9	82.9	86.7	77.6	82.4	-1.5	3.2
IEF	2007	LIF	77.1	73.3	79.1	78.3	76.9	-0.2	2.4
IEF	2007	LIF	81.2	83.4	77.4	79.3	80.0333	-1.16667	2.24444
IEF	2007	LIF	81.8	82.5	84.7	75.5	80.9	-0.9	3.6
IEF	2007	LIF	79.7	89.4	71.3	77.4	79.3667	-0.33333	6.68889
IEF	2007	LIF	82.9	82.5	86.5	79.9	82.9667	0.06667	2.35556
IEF	2007	LIF	89.8	94.1	91.9	79.4	88.4667	-1.33333	6.04444
IEF	2007	LIF	67.1	47.6	77.2	79.2	68	0.9	13.6
IEF	2007	LIF	69.6	61.4	92.9	84.7	79.6667	10.0667	12.1778
IEF	2007	LIF	87	97.9	74.5	85.7	86.0333	-0.96667	7.91111
IEF	2007	LIF	76.5	87.8	55.4	81.7	74.9667	-1.53333	13.0444
IEF	2007	LIF	82.5	85.3	79.9	84.4	83.2	0.7	2.2
IEF	2007	LIF	80.8	73.8	78.4	85.4	79.2	-1.6	4.13333
IEF	2007	LIF	87.2	86.3	92.6	86.2	88.3667	1.16667	2.82222
IEF	2007	LIF	81.7	78.8	75.8	86.2	80.2667	-1.43333	3.95556
IEF	2007	LIF	87.1	87.1	89.9	85.6	87.5333	0.43333	1.57778
IEF	2007	LIF	88.5	89.2	91.8	84.3	88.4333	-0.066666	2.75556
IEF	2007	LIF	84.6	78.6	94.7	86.5	86.6	2	5.4
IEF	2007	LIF	86.1	87.7	91.2	79.4	86.1	0	4.46667
IEF	2007	LIF	76.6	65.6	85	74.9	75.1667	-1.43334	6.55556
IEF	2007	LIF	85	83.8	83.5	82.8	83.3667	-1.63333	0.377778
IEF	2007	LIF	74.2	68.7	74	76.1	72.9333	-1.26667	2.82222
IEF	2007	LIF	79.5	72	82.9	77.2	77.3667	-2.13333	3.68889
IEF	2007	LIF	77.6	80.2	70.2	80.4	76.9333	-0.666666	4.48889
IEF	2007	LIF	81	70.5	84.8	81.3	78.8667	-2.13333	5.57778
IEF	2007	LIF	73.2	37	89.2	80.8	69	-4.2	21.3333
IEF	2007	LIF	90.9	92.1	90.5	84.8	89.1333	-1.76667	2.88889
IEF	2007	LIF	82	98.7	77.1	84.1	86.6333	4.63333	8.04444
IEF	2007	LIF	80.6	76.4	80.8	82.1	79.7667	-0.83333	2.24444
IEF	2007	LIF	87.9	86.6	91.9	84.9	87.8	-0.1	2.73333
IEF	2007	LIF	81.7	78.3	84.5	84.7	82.5	0.8	2.8
IEF	2007	LIF	84.5	86.9	80	86.4	84.4333	-0.066666	2.95556
IEF	2007	LIF	84.1	79.7	89.5	82.5	83.9	-0.2	3.73333
IEF	2007	LIF	91.1	90.3	96	84.3	90.2	-0.9	3.93333
IEF	2007	LIF	91	93.8	94.6	84.7	91.0333	0.03333	4.22222
IEF	2007	LIF	81	77	90.6	83.1	83.5667	2.56667	4.68889
IEF	2007	LIF	82.1	75.9	90.2	79.9	82	-0.1	5.46667
IEF	2007	LIF	81.8	92.5	65	84.1	80.5333	-1.26667	10.3556
IEF	2007	LIF	87.8	87.3	86.8	89.7	87.9333	0.133334	1.17778
IEF	2007	LIF	88.6	93.5	84.2	89.3	89	0.4	3.2
IEF	2007	LIF	84.4	77.7	84.5	85.5	82.5667	-1.83333	3.24444
IEF	2007	LIF	94.6	97.4	92.8	83.3	91.1667	-3.43334	5.24444
IEF	2007	LIF	80.5	86.5	72.8	83	80.7667	0.26667	5.31111
IEF	2007	LIF	87.7	81.8	94.4	86.9	87.7	0	4.46667
IEF	2007	LIF	88	87.7	88.7	88.9	88.4333	0.433334	0.488889
IEF	2007	LIF	92.8	98.4	87.1	91.3	92.2667	-0.53333	4.08889
IEF	2007	LIF	82.7	97.4	75.1	94.4	88.9667	6.26667	9.24444
IEF	2007	LIF	68.1	85.5	56.4	65.6	69.1667	1.06666	10.8889
IEF	2007	LIF	72	67	70.5	81	72.8333	0.833336	5.44444
IEF	2007	LIF	75.5	69.8	75.1	84.5	76.4667	0.96667	5.35556
IEF	2007	LIF	76.8	59.1	84.9	76.9	73.6333	-3.16667	9.68889
IEF	2007	LIF	81.5	81.7	81.7	80.1	81.1667	-0.333336	0.711111
IEF	2007	LIF	79.3	83.7	62.4	84	76.7	-2.6	9.53333
IEF	2007	LIF	86.1	90.1	86.5	84.2	86.9333	0.833334	2.11111
IEF	2007	LIF	91.9	94.7	90.5	84.5	89.9	-2	3.6
IEF	2007	LIF	88.4	91.4	92.2	82.2	88.6	0.2	4.26667
IEF	2007	LIF	88.3	88.5	90.1	87.4	88.6667	0.366664	0.955556
IEF	2007	LIF	79.7	74.5	75.9	82.7	77.7	-2	3.33333
IEF	2007	LIF	86.3	83.1	93.3	84.9	87.1	0.8	4.13333
IEF	2007	LIF	79.8	71.3	82.4	85.6	79.7667	-0.03333	5.64444
IEF	2007	LIF	87.3	80.2	97.4	84.7	87.4333	0.133334	6.64444
IEF	2007	LIF	91.7	90.1	88.9	84.1	87.7	-4	2.4
IEF	2007	LIF	85.3	82	89.4	82.2	84.5333	-0.76667	3.24444
IEF	2007	LIF	86.5	91.8	82.6	86.3	86.9	0.4	3.26667
IEF	2007	LIF	92.1	91.3	97.9	87	92.0667	-0.033334	3.88889
IEF	2007	LIF	80.4	86	73.9	82.9	80.9333	0.533334	4.68889
IEF	2007	LIF	92.1	90	99.4	84.8	91.4	-0.7	5.33333
IEF	2007	LIF	82	66	97	83.8	82.2667	0.26667	10.8444
IEF	2007	LIF	85.5	83	87.6	86.5	85.7	0.2	1.8
IEF	2007	LIF	82.9	85	77.8	84.3	82.3667	-0.53333	3.04444
IEF	2007	LIF	80.5	84.7	75.8	88.4	82.9667	2.46667	4.77778
IEF	2007	LIF	84.3	65.9	90.6	87.2	81.2333	-3.06667	10.2222
IEF	2007	LIF	90.3	96.6	86.9	87.1	90.2	-0.1	4.26667
IEF	2007	LIF	84	79.2	81.8	90.2	83.7333	-0.26667	4.31111
IEF	2007	LIF	87.9	91.8	63.6	86.8	80.7333	-7.16667	11.4222
IEF	2007	LIF	81.2	62	89.8	87	79.6	-1.6	11.7333
IEF	2007	LIF	76.9	76.7	59.6	87.7	74.6667	-2.23334	10.0444
IEF	2007	LIF	90.8	88	93.9	90.2	90.7	-0.1	2.13333
IEF	2007	LIF	92.4	97.6	89.9	87.1	91.5333	-0.86667	4.04444
IEF	2007	LIF	84.7	79.1	82.3	89.3	83.5667	-1.13333	3.82222
IEF	2007	LIF	85.7	78.6	84.7	92.1	85.1333	-0.56667	4.64444
IEF	2007	LIF	85.9	89.3	80.3	87.7	85.7667	-0.13333	3.64444
IEF	2007	LIF	87.8	99	80.4	86	88.4667	0.66667	7.02222
IEF	2007	LIF	81.4	82.4	75.2	81.6	79.7333	-1.66667	3.02222
IEF	2007	LIF	87.4	87.4	87.3	87.2	87.3	-0.1	0.066667
IEF	2007	LIF	80.7	87.1	68.3	89.4	81.6	0.9	8.86667
IEF	2007	LIF	89.4	91.8	85.6	86.3	87.9	-1.5	2.6
IEF	2007	LIF	84.8	82.1	85.4	89.8	85.7667	0.96667	2.68889
IEF	2007	LIF	93.8	95.5	89.2	86.3	90.3333	-3.46666	3.44444
IEF	2007	LIF	84.3	78.8	84.8	88.4	84	-0.3	3.46667
IEF	2007	LIF	87.5	78.2	89.2	88.2	85.2	-2.3	4.66667
IEF	2007	LIF	89.6	71.6	93.5	90	85.0333	-4.56667	8.95556
IEF	2007	LIF	94.2	94.2	95.7	93.1	94.3333	0.133336	0.911111
IEF	2007	LIF	83.8	81.9	83	86.7	83.8667	0.06667	1.88889
IEF	2007	LIF	82.5	79.4	71.3	85.8	78.8333	-3.66666	5.02222
IEF	2007	LIF	86.3	70.5	90.5	87.6	82.8667	-3.43333	8.24444
IEF	2007	LIF	88	84.6	80	89.8	84.8	-3.2	3.33333
IEF	2007	LIF	90.6	97.1	82.4	91.7	90.4	-0.2	5.33333
IEF	2007	LIF	78.1	78.6	71.1	89.5	79.7333	1.63333	6.51111
IEF	2007	LIF	92.5	93.6	94.5	88.4	92.1667	-0.333336	2.51111
IEF	2007	LIF	82.4	89.4	74.4	89.4	84.4	2	6.66667
IEF	2007	LIF	91.1	93.5	87.3	90.2	90.3333	-0.766664	2.11111
IEF	2007	LIF	93.1	89.5	98	91	92.8333	-0.266664	3.44444
IEF	2007	LIF	84.7	83.7	81.8	91.7	85.7333	1.03333	3.97778
IEF	2007	LIF	89.5	88	87.6	89.7	88.4333	-1.06667	0.844444
IEF	2007	LIF	89.5	86.4	92.4	92.7	90.5	1	2.73333
IEF	2007	LIF	93.9	87.9	97.2	92.6	92.5667	-1.33333	3.11111
IEF	2007	LIF	78.6	80.3	91.2	70.6	80.7	2.1	7
IEF	2007	LIF	86.4	86.2	85.7	87.4	86.4333	0.033334	0.644444
IEF	2007	LIF	83.9	78.6	88.8	84.7	84.0333	0.13333	3.62222
IEF	2007	LIF	78.3	77.5	75	81	77.8333	-0.466664	2.11111
IEF	2007	LIF	88.4	87.2	88.1	81.6	85.6333	-2.76667	2.68889
IEF	2007	LIF	87.1	88.1	87.7	81	85.6	-1.5	3.06667
IEF	2007	LIF	76.9	79.5	73.5	83	78.6667	1.76666	3.44444
IEF	2007	LIF	87.8	87.1	84.1	85	85.4	-2.4	1.13333
IEF	2007	LIF	88.1	85.6	90.8	86.2	87.5333	-0.56667	2.17778
IEF	2007	LIF	83	77.5	84.9	85.7	82.7	-0.3	3.46667
IEF	2007	LIF	87.8	81.3	90.2	90.1	87.2	-0.6	3.93333
IEF	2007	LIF	80	77.8	75.7	86.8	80.1	0.1	4.46667
IEF	2007	LIF	88.7	77.6	94.2	86.5	86.1	-2.6	5.66667
IEF	2007	LIF	79.2	77.2	68	87	77.4	-1.8	6.4
IEF	2007	LIF	93.8	94.2	92.5	90.6	92.4333	-1.36667	1.22222
IEF	2007	LIF	91	92.2	88.5	88.7	89.8	-1.2	1.6
IEF	2007	LIF	89.3	86.7	88.3	93.6	89.5333	0.23333	2.71111
IEF	2007	LIF	89.6	94.5	85.1	89.5	89.7	0.1	3.2
IEF	2007	LIF	82.1	83.6	75.6	88.4	82.5333	0.43333	4.62222
IEF	2007	LIF	88.4	96	80.6	85.7	87.4333	-0.966666	5.71111
IEF	2007	LIF	68.6	66.5	56.2	88.7	70.4667	1.86667	12.1556
IEF	2007	LIF	87.7	86.5	88.9	87.6	87.6667	-0.033336	0.822222
IEF	2007	LIF	90.3	87.6	94.7	89	90.4333	0.133334	2.84444
IEF	2007	LIF	87.5	88.4	81.8	89.2	86.4667	-1.03333	3.11111
IEF	2007	LIF	88.1	88.4	81.4	91.5	87.1	-1	3.8
IEF	2007	LIF	87.9	99	74.5	87	86.8333	-1.06666	8.22222
IEF	2007	LIF	89.9	93.7	88.9	89.2	90.6	0.7	2.06667
IEF	2007	LIF	88.6	92.8	84.7	87.6	88.3667	-0.23333	2.95556
IEF	2007	LIF	93.5	99.2	88.6	91.6	93.1333	-0.36667	4.04444
IEF	2007	LIF	84.4	79.2	80	89.2	82.8	-1.6	4.26667
IEF	2007	LIF	81.4	77.2	80.5	88.7	82.1333	0.73333	4.37778
IEF	2007	LIF	91	96.9	85.1	87.6	89.8667	-1.13333	4.68889
IEF	2007	LIF	90.3	82.1	95.7	90	89.2667	-1.03333	4.77778
IEF	2007	LIF	80.6	79.6	74.8	89.1	81.1667	0.566664	5.28889
IEF	2007	LIF	90.3	90.4	78	90.3	86.2333	-4.06667	5.48889
IEF	2007	LIF	87.3	91.2	76.5	91.1	86.2667	-1.03333	6.51111
IEF	2007	LIF	82.9	81.7	68.6	91.5	80.6	-2.3	8
IEF	2007	LIF	87.2	71.8	91.6	91.5	84.9667	-2.23333	8.77778
IEF	2007	LIF	73.4	67.6	63	87.1	72.5667	-0.833334	9.68889
IEF	2007	LIF	68.8	68.2	61.5	89.6	73.1	4.3	11
IEF	2007	LIF	66.9	51.8	69.5	87.1	69.4667	2.56667	11.7778
IEF	2007	LIF	78.7	55.3	88.4	84.2	75.9667	-2.73333	13.7778
IEF	2007	LIF	90.1	88.6	92.9	89.1	90.2	0.1	1.8
IEF	2007	LIF	88.9	91.2	84.6	91.6	89.1333	0.23333	3.02222
IEF	2007	LIF	92.4	96.1	93.5	87.7	92.4333	0.033334	3.15556
IEF	2007	LIF	89.2	82.1	89.5	91.5	87.7	-1.5	3.73333
IEF	2007	LIF	85.5	78.6	88.9	88.8	85.4333	-0.066666	4.55556
IEF	2007	LIF	84.4	85.1	78.4	92.5	85.3333	0.933336	4.77778
IEF	2007	LIF	84.5	89.2	65	90.3	81.5	-3	11
IEF	2007	LIF	92.2	93.4	91.5	91	91.9667	-0.23333	0.955556
IEF	2007	LIF	91.8	96.8	87.9	91.8	92.1667	0.366664	3.08889
IEF	2007	LIF	88.8	98.8	88	87	91.2667	2.46667	5.02222
IEF	2007	LIF	85.9	85.2	76.7	91.8	84.5667	-1.33333	5.24444
IEF	2007	LIF	85	85.3	87.1	89.3	87.2333	2.23333	1.37778
IEF	2007	LIF	94.5	95.5	96.8	92.7	95	0.5	1.53333
IEF	2007	LIF	87.1	89.5	86.1	85.7	87.1	0	1.6
IEF	2007	LIF	87.6	83.7	88	91	87.5667	-0.033334	2.57778
IEF	2007	LIF	89.3	89.7	83.7	93.6	89	-0.3	3.53333
IEF	2007	LIF	87.3	83.5	82.9	93.3	86.5667	-0.733334	4.48889
IEF	2007	LIF	90	81.1	92.4	92.3	88.6	-1.4	5
IEF	2007	LIF	83.9	85.1	74.9	89.1	83.0333	-0.86667	5.42222
IEF	2007	LIF	86.2	74.4	89.6	97	87	0.8	8.4
IEF	2007	LIF	84	84	84.8	89.6	86.1333	2.13333	2.31111
IEF	2007	LIF	80.3	69.6	75.6	79.3	74.8333	-5.46666	3.48889
IEF	2007	LIF	86.4	92.2	83.2	83.4	86.2667	-0.13333	3.95556
IEF	2007	LIF	90.2	94.1	88.9	90.6	91.2	1	1.93333
IEF	2007	LIF	88	84.9	91	88.6	88.1667	0.166664	2.17778
IEF	2007	LIF	88	93.3	80.9	86.1	86.7667	-1.23333	4.35556
IEF	2007	LIF	79.9	64.2	83.6	88.2	78.6667	-1.23334	9.64444
IEF	2007	LIF	93	93.4	96.3	90.5	93.4	0.4	1.93333
IEF	2007	LIF	93.1	96.2	92.6	90.9	93.2333	0.13333	1.97778
IEF	2007	LIF	81.3	63.3	77	88.3	76.2	-5.1	8.6
IEF	2007	LIF	90.4	90.3	88.8	92.2	90.4333	0.033334	1.17778
IEF	2007	LIF	92.8	89.5	95.5	91.9	92.3	-0.5	2.13333
IEF	2007	LIF	85.5	84.7	83.4	89.3	85.8	0.3	2.33333
IEF	2007	LIF	89.6	90.6	84.7	92.1	89.1333	-0.46667	2.95556
IEF	2007	LIF	84.9	78.2	84	89.7	83.9667	-0.93333	3.84444
IEF	2007	LIF	90.1	82.6	92.7	94.4	89.9	-0.2	4.86667
IEF	2007	LIF	79.4	75.8	56.8	94	75.5333	-3.86667	12.4889
IEF	2007	LIF	87	84.1	85.3	89.9	86.4333	-0.566666	2.31111
IEF	2007	LIF	87.7	85.1	84.5	92.6	87.4	-0.3	3.46667
IEF	2007	LIF	90	91.6	83.6	94.1	89.7667	-0.23333	4.11111
IEF	2007	LIF	81.6	73.1	79.1	90.2	80.8	-0.8	6.26667
IEF	2007	LIF	92.4	91.7	80.8	93.6	88.7	-3.7	5.26667
IEF	2007	LIF	81.7	79.3	73.9	90.2	81.1333	-0.56667	6.04444
IEF	2007	LIF	83.6	77.7	91.1	93.6	87.4667	3.86667	6.51111
IEF	2007	LIF	83.7	82.4	71.5	95.5	83.1333	-0.56667	8.24444
IEF	2007	LIF	90.4	91.1	90.4	88.2	89.9	-0.5	1.13333
IEF	2007	LIF	84.4	81.9	86.6	87.5	85.3333	0.933336	2.28889
IEF	2007	LIF	89.1	82.3	89.6	88.3	86.7333	-2.36667	2.95556
IEF	2007	LIF	88.9	89.6	85.7	91.1	88.8	-0.1	2.06667
IEF	2007	LIF	79.4	75.7	75.4	86.3	79.1333	-0.26667	4.77778
IEF	2007	LIF	84.3	76.6	86.3	89.8	84.2333	-0.06667	5.08889
IEF	2007	LIF	88.4	89	81.4	92.5	87.6333	-0.76667	4.15556
IEF	2007	LIF	86.2	91	71.5	88	83.5	-2.7	8
IEF	2007	LIF	89.4	86.3	89.8	89.8	88.6333	-0.76667	1.55556
IEF	2007	LIF	85.4	82.7	77.9	91.8	84.1333	-1.26667	5.11111
IEF	2007	LIF	78.1	66.6	77.7	90.8	78.3667	0.26667	8.28889
IEF	2007	LIF	87.9	86.8	86.4	89.8	87.6667	-0.233336	1.42222
IEF	2007	LIF	86.4	82.5	91	89.8	87.7667	1.36667	3.51111
IEF	2007	LIF	86.9	87.2	81	92.2	86.8	-0.1	3.86667
IEF	2007	LIF	90.9	86	90.9	92.3	89.7333	-1.16667	2.48889
IEF	2007	LIF	89.3	93.9	86.3	94.2	91.4667	2.16667	3.44444
IEF	2007	LIF	88.3	83.5	86.6	93.4	87.8333	-0.466664	3.71111
IEF	2007	LIF	87	88	84.7	89.2	87.3	0.3	1.73333
IEF	2007	LIF	95.5	92	99	95.3	95.4333	-0.066666	2.37778
IEF	2007	LIF	91.2	84.7	87.8	94	88.8333	-2.36666	3.44444
IEF	2007	LIF	88.7	87.5	80.7	91.2	86.4667	-2.23333	3.84444
IEF	2007	LIF	85.3	73.4	84.7	95.7	84.6	-0.7	7.46667
IEF	2007	LIF	77.5	93.4	55	92.1	80.1667	2.66666	16.7778
IEF	2007	LIF	94.3	96.1	94	94.4	94.8333	0.533336	0.844444
IEF	2007	LIF	90	90.1	87.4	91.5	89.6667	-0.333336	1.51111
IEF	2007	LIF	84.3	83.3	77.5	92.8	84.5333	0.23333	5.51111
IEF	2007	LIF	83.6	74.5	84.7	91.2	83.4667	-0.13333	5.97778
IEF	2007	LIF	92.2	95	97.9	82	91.6333	-0.56667	6.42222
IEF	2007	LIF	82.7	83.8	73.5	88.8	82.0333	-0.66667	5.68889
IEF	2007	LIF	85.7	76.1	89.1	91.3	85.5	-0.2	6.26667
IEF	2007	LIF	77.2	76.5	76.9	85.1	79.5	2.3	3.73333
IEF	2007	LIF	80.6	86	71.5	92.3	83.2667	2.66667	7.84444
IEF	2007	LIF	89.5	87.4	93.6	90.6	90.5333	1.03333	2.08889
IEF	2007	LIF	78.9	72.5	78	90.2	80.2333	1.33333	6.64444
IEF	2007	LIF	92.9	90.4	93.8	94.4	92.8667	-0.03333	1.64444
IEF	2007	LIF	93.9	88.3	96	95.2	93.1667	-0.733336	3.24444
IEF	2007	LIF	90.2	86	84.5	93.3	87.9333	-2.26667	3.57778
IEF	2007	LIF	90.8	94.1	82.3	92.7	89.7	-1.1	4.93333
IEF	2007	LIF	81.3	78.9	77.8	91.2	82.6333	1.33333	5.71111
IEF	2007	LIF	87.2	91.1	77.5	93.7	87.4333	0.233334	6.62222
IEF	2007	LIF	84.2	75.3	89.7	87.2	84.0667	-0.133334	5.84444
IEF	2007	LIF	93.7	96.5	86.6	94.7	92.6	-1.1	4
IEF	2007	LIF	90.4	95.5	81.4	93.9	90.2667	-0.13333	5.91111
IEF	2007	LIF	90.9	87.7	91.4	94.4	91.1667	0.266664	2.31111
IEF	2007	LIF	89.6	80.3	86.6	92.3	86.4	-3.2	4.06667
IEF	2007	LIF	90.9	89.5	83.1	95.7	89.4333	-1.46667	4.22222
IEF	2007	LIF	92.2	84.8	95.8	95.7	92.1	-0.1	4.86667
IEF	2007	LIF	91.9	97	83.1	96	92.0333	0.13333	5.95556
IEF	2007	LIF	87.6	77.7	84.9	95.9	86.1667	-1.43334	6.48889
IEF	2007	LIF	90.9	79.8	97.4	93.9	90.3667	-0.53333	7.04444
IEF	2007	LIF	87	85.2	72	93.6	83.6	-3.4	7.73333
IEF	2007	LIF	85.3	72.4	86.5	94.2	84.3667	-0.93333	7.97778
IEF	2007	LIF	77.6	76.1	72.7	97	81.9333	4.33333	10.0444
IEF	2007	LIF	68	73.8	53.3	91.7	72.9333	4.93333	13.0889
IEF	2007	LIF	95.9	95.7	95.3	97	96	0.1	0.666667
IEF	2007	LIF	90.8	89.4	87.9	95.5	90.9333	0.133334	3.04444
IEF	2007	LIF	90	84.5	85.7	97.1	89.1	-0.9	5.33333
IEF	2007	LIF	85.8	83.8	80.8	94.9	86.5	0.7	5.6
IEF	2007	LIF	85.4	87.1	77.1	94.8	86.3333	0.933336	6.15556
IEF	2007	LIF	90.5	90.9	71.5	95.1	85.8333	-4.66666	9.55556
IEF	2007	LIF	88	70.9	89.6	97.6	86.0333	-1.96667	10.0889
IEF	2007	LIF	89.7	98.1	73.7	97.1	89.6333	-0.06667	10.6222
IEF	2007	LIF	83.7	82.2	76.5	96.2	84.9667	1.26667	7.48889
IEF	2007	LIF	82.9	74	83.1	90.7	82.6	-0.3	5.73333
IEF	2007	LIF	94.5	91	95	96.1	94.0333	-0.46667	2.02222
IEF	2007	LIF	97	98.7	90.7	97.3	95.5667	-1.43333	3.24444
IEF	2007	LIF	91.8	92	82.9	98.1	91	-0.8	5.4
IEF	2007	LIF	89.5	85.4	83.7	97	88.7	-0.8	5.53333
IEF	2007	LIF	84.1	83.2	76.2	98.1	85.8333	1.73334	8.17778
IEF	2007	LIF	82.9	77.4	75.5	96	82.9667	0.06667	8.68889
IEF	2007	LIF	76.8	55	85.5	98.1	79.5333	2.73333	16.3556
IEF	2007	LIF	92.3	93.8	84.2	99.1	92.3667	0.06667	5.44444
IEF	2007	LIF	85.8	82.9	79.3	93.6	85.2667	-0.53333	5.55556
IEF	2007	LIF	90.8	81	90.6	96.8	89.4667	-1.33333	5.64444
IEF	2007	LIF	85.3	77	83.9	98	86.3	1	7.8
IEF	2007	LIF	83.6	78.5	77	97.8	84.4333	0.833334	8.91111
IEF	2007	LIF	83.6	70	81.7	96.2	82.6333	-0.96667	9.04444
IEF	2007	LIF	82.3	78.9	80.5	87.5	82.3	0	3.46667
IEF	2007	LIF	91.4	95	84.2	92	90.4	-1	4.13333
IEF	2007	LIF	87.2	72	89.4	96	85.8	-1.4	9.2
IEF	2007	LIF	89.9	81.5	88.9	96.5	88.9667	-0.93333	5.02222
IEF	2007	LIF	94.2	91.8	93	95.9	93.5667	-0.633334	1.55556
IEF	2007	LIF	96.2	92.8	96.5	97.9	95.7333	-0.46667	1.95556
IEF	2007	LIF	87.3	81.7	89.2	94.1	88.3333	1.03334	4.42222
IEF	2007	LIF	90.3	83.1	93.9	95.5	90.8333	0.533336	5.15556
IEF	2007	LIF	85.5	78.7	79.5	94	84.0667	-1.43333	6.62222
IEF	2007	LIF	82.5	80.7	75.9	93.5	83.3667	0.86667	6.75556
IEF	2007	LIF	89	75	94.3	98.7	89.3333	0.333336	9.55556
IEF	2007	LIF	95.7	89.2	95.3	99.2	94.5667	-1.13333	3.57778
IEF	2007	LIF	93.3	87.1	94.6	96.4	92.7	-0.6	3.73333
IEF	2007	LIF	94	81.9	97.3	95.8	91.6667	-2.33334	6.51111
IEF	2007	LIF	90.3	88.3	73.4	99	86.9	-3.4	9
IEF	2007	LIF	93.5	94.5	58	100	84.1667	-9.33334	17.4444
IEF	2007	MAT	10	2	0	56	19.3333	9.33333	24.4444
IEF	2007	MAT	40.6	84.3	45.8	8	46.0333	5.43333	25.5111
IEF	2007	MAT	59.2	72	70.7	48.8	63.8333	4.63333	10.0222
IEF	2007	MAT	74	76.7	87.7	61.1	75.1667	1.16666	9.37778
IEF	2007	MAT	85.4	88.6	91.8	69.9	83.4333	-1.96667	9.02222
IEF	2007	MAT	77.1	79	84.3	65.6	76.3	-0.8	7.13333
IEF	2007	MAT	82.8	84.7	90.1	57.7	77.5	-5.3	13.2
IEF	2007	MAT	66	74.7	57.6	65.2	65.8333	-0.166664	5.91111
IEF	2007	MAT	59.6	60.5	49	66.6	58.7	-0.9	6.46667
IEF	2007	MAT	77.4	83	77.7	68.7	76.4667	-0.93333	5.17778
IEF	2007	MAT	75.7	63.4	79.7	75.3	72.8	-2.9	6.26667
IEF	2007	MAT	75.5	70.7	91	69.4	77.0333	1.53333	9.31111
IEF	2007	MAT	87.7	83.8	92.4	82.7	86.3	-1.4	4.06667
IEF	2007	MAT	77	70.4	90.8	74.1	78.4333	1.43333	8.24444
IEF	2007	MAT	69.5	70.5	70	74	71.5	2	1.66667
IEF	2007	MAT	73.7	73.2	73.3	73.3	73.2667	-0.43333	0.044444
IEF	2007	MAT	75	86.5	75.6	69.5	77.2	2.2	6.2
IEF	2007	MAT	72.6	95	57.8	65	72.6	0	14.9333
IEF	2007	MAT	78.4	82.4	79.9	75	79.1	0.7	2.73333
IEF	2007	MAT	90.1	91.1	89.1	81.7	87.3	-2.8	3.73333
IEF	2007	MAT	80.9	89.7	75.3	78.5	81.1667	0.266664	5.68889
IEF	2007	MAT	73.4	46.1	86.1	77.2	69.8	-3.6	15.8
IEF	2007	MAT	87.1	89.8	85.6	83.6	86.3333	-0.766664	2.31111
IEF	2007	MAT	82.6	78.6	94.1	80.9	84.5333	1.93333	6.37778
IEF	2007	MAT	87.9	92.7	81.9	83.4	86	-1.9	4.46667
IEF	2007	MAT	79.1	89.4	75.9	74.1	79.8	0.7	6.4
IEF	2007	MAT	78.8	88.9	77.2	74.9	80.3333	1.53334	5.71111
IEF	2007	MAT	74.1	68.8	80	75.5	74.7667	0.66667	3.97778
IEF	2007	MAT	83.7	88.9	82.3	83.7	84.9667	1.26667	2.62222
IEF	2007	MAT	78.6	57.5	89	84.2	76.9	-1.7	12.9333
IEF	2007	MAT	72	69.2	67.6	79.1	71.9667	-0.03333	4.75556
IEF	2007	MAT	75.9	84.8	74.2	78.8	79.2667	3.36667	3.68889
IEF	2007	MAT	88.4	88.7	91.4	83.8	87.9667	-0.43333	2.77778
IEF	2007	MAT	80.1	89.4	71	79.2	79.8667	-0.23333	6.35556
IEF	2007	MAT	86.2	86.2	88.1	82.6	85.6333	-0.56667	2.02222
IEF	2007	MAT	73.5	74.1	80.3	81.8	78.7333	5.23333	3.08889
IEF	2007	MAT	82.1	86	75.9	79.4	80.4333	-1.66667	3.71111
IEF	2007	MAT	69.1	53.2	69.5	81	67.9	-1.2	9.8
IEF	2007	MAT	86.7	92.4	90.5	86.3	89.7333	3.03333	2.28889
IEF	2007	MAT	89.4	94.1	82.8	86.6	87.8333	-1.56666	4.17778
IEF	2007	MAT	77.7	78.6	70.7	79.6	76.3	-1.4	3.73333
IEF	2007	MAT	69.3	70.2	57.8	78.9	68.9667	-0.33333	7.44444
IEF	2007	MAT	80.9	80.7	80	75.9	78.8667	-2.03333	1.97778
IEF	2007	MAT	77.9	88.4	70.6	89.6	82.8667	4.96667	8.17778
IEF	2007	MAT	86.6	80.6	88.3	88.1	85.6667	-0.933336	3.37778
IEF	2007	MAT	74.6	80.6	69.6	78.7	76.3	1.7	4.46667
IEF	2007	MAT	81.3	84.1	77.3	82.2	81.2	-0.1	2.6
IEF	2007	MAT	88.7	96	90.7	84	90.2333	1.53333	4.15556
IEF	2007	MAT	76.1	63.9	79.4	82.1	75.1333	-0.96667	7.48889
IEF	2007	MAT	81.8	77.1	87	85.6	83.2333	1.43333	4.08889
IEF	2007	MAT	71.8	62.5	66.5	95.5	74.8333	3.03334	13.7778
IEF	2007	MAT	67	64.6	59	87	70.2	3.2	11.2
IEF	2007	MAT	68.5	57.4	57.2	81.6	65.4	-3.1	10.8
IEF	2007	MAT	83.8	77	93.4	90.9	87.1	3.3	6.73333
IEF	2007	MAT	72.5	92.2	65.8	89.6	82.5333	10.0333	11.1556
IEF	2007	MAT	83	91.5	73.3	88.1	84.3	1.3	7.33333
IEF	2007	MAT	73.9	80.1	63.3	83.8	75.7333	1.83333	8.28889
IEF	2007	MAT	81.8	37.6	91.9	84.6	71.3667	-10.4333	22.5111
IEF	2007	MAT	91.2	91.4	88.9	91.8	90.7	-0.5	1.2
IEF	2007	MAT	87.7	87	79	96.9	87.6333	-0.06667	6.17778
IEF	2007	MAT	78.9	77.2	78.4	81.5	79.0333	0.13333	1.64444
IEF	2007	MAT	94.8	94.7	96.7	93.1	94.8333	0.033336	1.24444
IEF	2007	MAT	83.4	70.5	85.7	93	83.0667	-0.333334	8.37778
IEF	2007	MAT	91.9	87.7	96.8	88.2	90.9	-1	3.93333
IEF	2007	MAT	79.2	77.2	77.8	91	82	2.8	6
IEF	2007	MAT	85.6	84.4	85.4	96.7	88.8333	3.23334	5.24444
IEF	2007	MAT	86	90.7	74.9	96.2	87.2667	1.26667	8.24444
IEF	2007	MAT	91	73.5	93.9	95.6	87.6667	-3.33334	9.44444
IEF	2007	MAT	89.8	81.8	85.6	100	89.1333	-0.66667	7.24444
IEF	2007	PHY	21	30	66.6	1.5	32.7	11.7	22.6
IEF	2007	PHY	69.5	71.1	72.5	32	58.5333	-10.9667	17.6889
IEF	2007	PHY	44.5	25	70.1	38	44.3667	-0.133335	17.1556
IEF	2007	PHY	72.1	75	78	38.8	63.9333	-8.16667	16.7556
IEF	2007	PHY	69.8	75.8	73.3	46	65.0333	-4.76667	12.6889
IEF	2007	PHY	67.4	66.5	64.6	70.6	67.2333	-0.16667	2.24444
IEF	2007	PHY	70.8	58.4	73.6	75.7	69.2333	-1.56667	7.22222
IEF	2007	PHY	82.1	82.4	67	70.1	73.1667	-8.93334	6.15556
IEF	2007	PHY	76.1	89	82.5	52.5	74.6667	-1.43334	14.7778
IEF	2007	PHY	66.7	65.4	76.5	57.6	66.5	-0.2	6.66667
IEF	2007	PHY	63.8	61.6	73.8	56.5	63.9667	0.166667	6.55556
IEF	2007	PHY	69.8	76.7	73.1	59	69.6	-0.2	7.06667
IEF	2007	PHY	69.7	80	58	64.5	67.5	-2.2	8.33333
IEF	2007	PHY	66.7	63	81.1	62	68.7	2	8.26667
IEF	2007	PHY	71.9	76.2	75.1	62.6	71.3	-0.6	5.8
IEF	2007	PHY	69.4	73.6	81.5	74.4	76.5	7.1	3.33333
IEF	2007	PHY	82.3	95.6	77.9	69.4	80.9667	-1.33333	9.75556
IEF	2007	PHY	66.3	58.5	64.6	71.5	64.8667	-1.43333	4.42222
IEF	2007	PHY	76.3	88.3	82.6	58.1	76.3333	0.033336	12.1556
IEF	2007	PHY	68.5	75.1	62	69	68.7	0.2	4.46667
IEF	2007	PHY	72.3	49	88	70.2	69.0667	-3.23333	13.3778
IEF	2007	PHY	69.7	80.5	67.3	60.5	69.4333	-0.266666	7.37778
IEF	2007	PHY	40	46	22	42.7	36.9	-3.1	9.93333
IEF	2007	PHY	68.9	71.7	73.1	62.5	69.1	0.2	4.4
IEF	2007	PHY	78.7	82.7	76.7	67	75.4667	-3.23333	5.64444
IEF	2007	PHY	67.7	73.3	74.9	59.5	69.2333	1.53333	6.48889
IEF	2007	PHY	68.9	75	75.7	57.2	69.3	0.4	8.06667
IEF	2007	PHY	68.5	82.3	61.6	62.5	68.8	0.3	9
IEF	2007	PHY	83	82.1	97.6	66	81.9	-1.1	10.6
IEF	2007	PHY	77.7	97.5	79.8	61.5	79.6	1.9	12.0667
IEF	2007	PHY	68.1	63.5	90.1	70	74.5333	6.43333	10.3778
IEF	2007	PHY	50.6	43.3	53.9	54.7	50.6333	0.033335	4.88889
IEF	2007	PHY	63.4	47	62.1	69	59.3667	-4.03334	8.24444
IEF	2007	PHY	77.1	80	88.9	64.4	77.7667	0.66667	8.91111
IEF	2007	PHY	69.2	80.4	54.9	73.3	69.5333	0.33333	9.75556
IEF	2007	PHY	72.6	69	80.6	64.6	71.4	-1.2	6.13333
IEF	2007	PHY	76.9	77.9	72.5	79	76.4667	-0.43333	2.64444
IEF	2007	PHY	79.3	68.5	91.3	72.3	77.3667	-1.93333	9.28889
IEF	2007	PHY	90.5	85	90.9	74.9	83.6	-6.9	5.8
IEF	2007	PHY	55.6	33.5	64.4	74.2	57.3667	1.76666	15.9111
IEF	2007	PHY	63.6	62.5	81.5	68.5	70.8333	7.23334	7.11111
IEF	2007	PHY	79.9	85.2	74.8	73.6	77.8667	-2.03333	4.88889
IEF	2007	PHY	68.7	76	65.3	65.8	69.0333	0.33333	4.64444
IEF	2007	PHY	73.2	70.9	87.5	72.1	76.8333	3.63334	7.11111
IEF	2007	PHY	75.3	69.7	85.5	70.6	75.2667	-0.03333	6.82222
IEF	2007	PHY	83.1	90.2	78	79.9	82.7	-0.4	5
IEF	2007	PHY	86.6	87.6	89.3	80.1	85.6667	-0.933336	3.71111
IEF	2007	PHY	84.4	86.4	82.5	75.5	81.4667	-2.93333	3.97778
IEF	2007	PHY	68.6	72	68.3	63.5	67.9333	-0.666666	2.95556
IEF	2007	PHY	82.1	94.8	85.8	66.5	82.3667	0.26667	10.5778
IEF	2007	PHY	65	24.7	64	70.5	53.0667	-11.9333	18.9111
IEF	2007	PHY	76.4	81	77	67.4	75.1333	-1.26667	5.15556
IEF	2007	PHY	64.6	72	47	67	62	-2.6	10
IEF	2007	PHY	69	54.5	85.9	68.5	69.6333	0.63333	10.8444
IEF	2007	PHY	77.6	86.9	83.7	68.5	79.7	2.1	7.46667
IEF	2007	PHY	80	79.8	85.3	77.7	80.9333	0.933334	2.91111
IEF	2007	PHY	88.8	89.8	91.4	76.5	85.9	-2.9	6.26667
IEF	2007	PHY	69.5	69.7	53.5	73	65.4	-4.1	7.93333
IEF	2007	PHY	87.6	92	94.6	73.4	86.6667	-0.933336	8.84444
IEF	2007	PHY	74.4	72.5	75	74	73.8333	-0.566664	0.888889
IEF	2007	PHY	62.9	51	64.1	72.4	62.5	-0.4	7.66667
IEF	2007	PHY	81.9	95.6	70.3	77.6	81.1667	-0.733336	9.62222
IEF	2007	PHY	72.3	73.4	73.7	70.9	72.6667	0.366664	1.17778
IEF	2007	PHY	73.7	73.5	77.2	69	73.2333	-0.46667	2.82222
IEF	2007	PHY	65.5	62	65	74.9	67.3	1.8	5.06667
IEF	2007	PHY	78.1	66.1	88.8	75	76.6333	-1.46667	8.11111
IEF	2007	PHY	76.6	73.2	79.8	76.4	76.4667	-0.13333	2.22222
IEF	2007	PHY	84.4	86	84.3	82.4	84.2333	-0.16667	1.22222
IEF	2007	PHY	79.2	83.6	74.4	79	79	-0.2	3.06667
IEF	2007	PHY	64.8	61.3	60.3	78	66.5333	1.73333	7.64444
IEF	2007	PHY	80.7	78.4	86.3	81.1	81.9333	1.23333	2.91111
IEF	2007	PHY	90.3	81.8	95	85	87.2667	-3.03333	5.15556
IEF	2007	PHY	86.3	90.4	82.2	85	85.8667	-0.43333	3.02222
IEF	2007	PHY	72.2	63.3	79	75	72.4333	0.233334	6.08889
IEF	2007	PHY	67.4	75	51.3	75.9	67.4	0	10.7333
IEF	2007	PHY	79.7	79.6	81.7	79.4	80.2333	0.53333	0.977778
IEF	2007	PHY	71.8	64.5	79.8	67.9	70.7333	-1.06667	6.04444
IEF	2007	PHY	68.7	93.4	53.3	70.8	72.5	3.8	13.9333
IEF	2007	PHY	80.3	86.3	81.7	76.7	81.5667	1.26667	3.24444
IEF	2007	PHY	74.1	74.5	76	72.9	74.4667	0.36667	1.04444
IEF	2007	PHY	75.3	77.7	67.8	77.7	74.4	-0.9	4.4
IEF	2007	PHY	78.6	91.3	56.7	82.2	76.7333	-1.86667	13.3556
IEF	2007	PHY	62.6	87.2	51.9	57.2	65.4333	2.83333	14.5111
IEF	2007	PHY	74.4	89.8	50.8	81.1	73.9	-0.5	15.4
IEF	2007	PHY	72.5	57.1	83.4	77.1	72.5333	0.03333	10.2889
IEF	2007	PHY	78.2	81.2	72.6	79.8	77.8667	-0.33333	3.51111
IEF	2007	PHY	71.5	61	69.5	76.7	69.0667	-2.43333	5.37778
IEF	2007	PHY	73.1	64.6	77.5	76.7	72.9333	-0.166666	5.55556
IEF	2007	PHY	75.2	50.6	86.1	79	71.9	-3.3	14.2
IEF	2007	PHY	45.4	39	17.5	77.3	44.6	-0.8	21.8
IEF	2007	PHY	77.3	84.9	77.6	75.7	79.4	2.1	3.66667
IEF	2007	PHY	66.7	53	74.9	72.3	66.7333	0.03333	9.15556
IEF	2007	PHY	77.1	77.3	75.5	77.5	76.7667	-0.33333	0.844444
IEF	2007	PHY	83.9	87.6	81.2	80.7	83.1667	-0.733336	2.95556
IEF	2007	PHY	80.6	92.5	69.8	79.9	80.7333	0.13333	7.84444
IEF	2007	PHY	83.2	82.4	78.7	87.2	82.7667	-0.43333	2.95556
IEF	2007	PHY	77.6	83.7	69.7	83.9	79.1	1.5	6.26667
IEF	2007	PHY	81.6	76.4	81.9	83.9	80.7333	-0.86667	2.88889
IEF	2007	PHY	93.5	99.4	86.5	86.2	90.7	-2.8	5.8
IEF	2007	PHY	71.6	71.6	66.2	76	71.2667	-0.33333	3.37778
IEF	2007	PHY	72.3	86.6	58.8	75.9	73.7667	1.46667	9.97778
IEF	2007	PHY	82.2	83	83.5	75.2	80.5667	-1.63333	3.57778
IEF	2007	PHY	76.9	85.1	75	69	76.3667	-0.53333	5.82222
IEF	2007	PHY	77.9	71.1	82.6	78.1	77.2667	-0.63333	4.11111
IEF	2007	PHY	75.1	62	79.1	82.3	74.4667	-0.63333	8.31111
IEF	2007	PHY	82.6	94	90.8	77.7	87.5	4.9	6.53333
IEF	2007	PHY	72.2	76.5	70.7	69.9	72.3667	0.16667	2.75556
IEF	2007	PHY	64.6	54.8	63.4	67.1	61.7667	-2.83333	4.64444
IEF	2007	PHY	72.6	89.9	39	73.5	67.4667	-5.13333	18.9778
IEF	2007	PHY	84.1	87.1	84.4	79	83.5	-0.6	3
IEF	2007	PHY	85.3	86.6	93.9	77.7	86.0667	0.766666	5.57778
IEF	2007	PHY	78.5	85.9	75	74.4	78.4333	-0.066666	4.97778
IEF	2007	PHY	76.9	78.5	70.4	76	74.9667	-1.93333	3.04444
IEF	2007	PHY	90.6	91.8	89.7	78.5	86.6667	-3.93334	5.44444
IEF	2007	PHY	90.2	91.6	93.7	79.5	88.2667	-1.93333	5.84444
IEF	2007	PHY	73.8	80.2	60	77.9	72.7	-1.1	8.46667
IEF	2007	PHY	81.7	84.8	82.3	76	81.0333	-0.66667	3.35556
IEF	2007	PHY	81.8	80.6	81.4	80	80.6667	-1.13334	0.488889
IEF	2007	PHY	79.7	78.5	81.4	80	79.9667	0.26667	0.977778
IEF	2007	PHY	79.5	76.9	79.5	80	78.8	-0.7	1.26667
IEF	2007	PHY	82.9	84.8	82.7	80.9	82.8	-0.1	1.33333
IEF	2007	PHY	79	86	75.2	79	80.0667	1.06667	3.95556
IEF	2007	PHY	85.8	92	83	82.5	85.8333	0.033336	4.11111
IEF	2007	PHY	77.7	80.7	77.6	69.4	75.9	-1.8	4.33333
IEF	2007	PHY	88.9	93	88.5	80.2	87.2333	-1.66667	4.68889
IEF	2007	PHY	72.9	65.6	76.5	77.5	73.2	0.3	5.06667
IEF	2007	PHY	73.4	63	72.5	79.7	71.7333	-1.66667	5.82222
IEF	2007	PHY	73.9	74.9	59	81.2	71.7	-2.2	8.46667
IEF	2007	PHY	82.6	83.4	80.5	83.5	82.4667	-0.13333	1.31111
IEF	2007	PHY	76.6	74	80.6	73.3	75.9667	-0.63333	3.08889
IEF	2007	PHY	84.9	84.1	95.5	83.3	87.6333	2.73333	5.24444
IEF	2007	PHY	82.9	73.1	94.4	81.7	83.0667	0.166666	7.55556
IEF	2007	PHY	72.2	83.2	46.5	80.8	70.1667	-2.03334	15.7778
IEF	2007	PHY	82.1	74.7	84	82.4	80.3667	-1.73333	3.77778
IEF	2007	PHY	74.4	65	72.6	83	73.5333	-0.86667	6.31111
IEF	2007	PHY	80.1	87.2	63.8	82.7	77.9	-2.2	9.4
IEF	2007	PHY	91.9	96	91.4	85	90.8	-1.1	3.86667
IEF	2007	PHY	89.5	75.5	88.3	85	82.9333	-6.56667	4.95556
IEF	2007	PHY	90.6	72.1	90.5	85.7	82.7667	-7.83333	7.11111
IEF	2007	PHY	80.2	83.9	73.5	85.5	80.9667	0.76667	4.97778
IEF	2007	PHY	70.6	64	70.3	79.3	71.2	0.6	5.4
IEF	2007	PHY	82.7	93.1	81	75.2	83.1	0.4	6.66667
IEF	2007	PHY	88.4	90.5	90.5	79.9	86.9667	-1.43333	4.71111
IEF	2007	PHY	78.9	83.9	75.2	79.8	79.6333	0.73333	2.95556
IEF	2007	PHY	85.1	85.3	87.1	82.1	84.8333	-0.266664	1.82222
IEF	2007	PHY	79.5	75.3	80.3	80.1	78.5667	-0.933334	2.17778
IEF	2007	PHY	80.5	78.6	80.5	84.5	81.2	0.7	2.2
IEF	2007	PHY	81.6	85.2	76.4	82.3	81.3	-0.3	3.26667
IEF	2007	PHY	83.9	75.8	86.5	81.8	81.3667	-2.53333	3.71111
IEF	2007	PHY	85.6	77.3	88.7	87.7	84.5667	-1.03333	4.84444
IEF	2007	PHY	78.1	72	73.9	82.1	76	-2.1	4.06667
IEF	2007	PHY	79.2	90.9	63	85.2	79.7	0.5	11.1333
IEF	2007	PHY	86	78.3	89.5	89.4	85.7333	-0.26667	4.95556
IEF	2007	PHY	76.4	59.2	76.2	77.5	70.9667	-5.43333	7.84444
IEF	2007	PHY	73.1	80.7	75.2	71.9	75.9333	2.83333	3.17778
IEF	2007	PHY	88.7	86.7	92.9	81.2	86.9333	-1.76667	3.97778
IEF	2007	PHY	82	83.7	77	82.3	81	-1	2.66667
IEF	2007	PHY	79.9	76.1	84	82.5	80.8667	0.96667	3.17778
IEF	2007	PHY	83	75.6	89.7	83.3	82.8667	-0.13333	4.84444
IEF	2007	PHY	83.8	86	81.9	84.3	84.0667	0.266666	1.44444
IEF	2007	PHY	80.7	78.3	78.9	83	80.0667	-0.633334	1.95556
IEF	2007	PHY	78	83.3	70.8	81.9	78.6667	0.666664	5.24444
IEF	2007	PHY	73.8	76.6	67.5	82.3	75.4667	1.66667	5.31111
IEF	2007	PHY	89.9	92.9	88.6	85.6	89.0333	-0.86667	2.57778
IEF	2007	PHY	94.8	91.8	92.5	85.8	90.0333	-4.76667	2.82222
IEF	2007	PHY	87.3	88.3	77.6	89.3	85.0667	-2.23333	4.97778
IEF	2007	PHY	81.3	91	70.4	84.6	82	0.7	7.73333
IEF	2007	PHY	86	71.6	91.7	88.3	83.8667	-2.13333	8.17778
IEF	2007	PHY	82.6	73.6	83.6	86.7	81.3	-1.3	5.13333
IEF	2007	PHY	75.7	70.5	92.7	68.1	77.1	1.4	10.4
IEF	2007	PHY	87.7	94.3	87.4	80.8	87.5	-0.2	4.53333
IEF	2007	PHY	82.7	85.6	82.3	80.4	82.7667	0.06667	1.88889
IEF	2007	PHY	85	81	85.5	85.1	83.8667	-1.13333	1.91111
IEF	2007	PHY	86.7	85.3	90.1	86.1	87.1667	0.466664	1.95556
IEF	2007	PHY	90.1	90.4	92.6	83.9	88.9667	-1.13333	3.37778
IEF	2007	PHY	82.6	77.8	78.1	86.5	80.8	-1.8	3.8
IEF	2007	PHY	85.8	78.1	84.6	89.8	84.1667	-1.63334	4.04444
IEF	2007	PHY	86.5	95.1	77.6	86	86.2333	-0.26667	5.91111
IEF	2007	PHY	86.8	87.3	84.6	87.3	86.4	-0.4	1.2
IEF	2007	PHY	90.4	88	95.9	86.9	90.2667	-0.13333	3.75556
IEF	2007	PHY	89.6	92.8	87.5	88.2	89.5	-0.1	2.2
IEF	2007	PHY	86.3	79.3	87.3	88.2	84.9333	-1.36667	3.75556
IEF	2007	PHY	86	79.1	88.8	88	85.3	-0.7	4.13333
IEF	2007	PHY	82.6	77.1	80.4	87.9	81.8	-0.8	4.06667
IEF	2007	PHY	87.6	90.3	87.1	81	86.1333	-1.46667	3.42222
IEF	2007	PHY	85.9	83	96.3	83.3	87.5333	1.63333	5.84444
IEF	2007	PHY	83	83.4	83.5	82.8	83.2333	0.23333	0.288889
IEF	2007	PHY	79.5	75.1	79.4	83.7	79.4	-0.1	2.86667
IEF	2007	PHY	85.1	88.7	84.3	81.5	84.8333	-0.266664	2.57778
IEF	2007	PHY	83.3	79.2	76	83.5	79.5667	-3.73333	2.62222
IEF	2007	PHY	80	70	78.5	88.1	78.8667	-1.13333	6.15556
IEF	2007	PHY	73.7	56	68	87	70.3333	-3.36666	11.1111
IEF	2007	PHY	87.8	92.4	87.2	83.3	87.6333	-0.16667	3.17778
IEF	2007	PHY	81.6	79.8	74.9	89.5	81.4	-0.2	5.4
IEF	2007	PHY	85.2	71.3	92.4	86.8	83.5	-1.7	8.13333
IEF	2007	PHY	87.8	83.7	83.8	86.5	84.6667	-3.13334	1.22222
IEF	2007	PHY	84.1	78.9	84	88.4	83.7667	-0.33333	3.24444
IEF	2007	PHY	89.8	94.8	88.6	85.9	89.7667	-0.03333	3.35556
IEF	2007	PHY	79.5	82.1	73.9	83.5	79.8333	0.333336	3.95556
IEF	2007	PHY	87.8	94.5	72.5	87.8	84.9333	-2.86667	8.28889
IEF	2007	PHY	87.8	88.3	85.7	88.9	87.6333	-0.16667	1.28889
IEF	2007	PHY	85.4	92	78.6	85.8	85.4667	0.06667	4.57778
IEF	2007	PHY	75.4	76.5	64	87	75.8333	0.433336	7.88889
IEF	2007	PHY	85.8	80	82.2	91.2	84.4667	-1.33333	4.48889
IEF	2007	PHY	90.8	81.7	93.2	91.5	88.8	-2	4.73333
IEF	2007	PHY	85	85.8	74	87.5	82.4333	-2.56667	5.62222
IEF	2007	PHY	87	72	94.2	91.6	85.9333	-1.06667	9.28889
IEF	2007	PHY	80.4	80.9	63.5	91.5	78.6333	-1.76667	10.0889
IEF	2007	PHY	70.1	59.5	56.5	88.6	68.2	-1.9	13.6
IEF	2007	PHY	90.9	91.4	84	91.6	89	-1.9	3.33333
IEF	2007	PHY	88.3	91.1	84.5	89.9	88.5	0.2	2.66667
IEF	2007	PHY	87	83.9	82.9	92.4	86.4	-0.6	4
IEF	2007	PHY	86.7	86.3	75.5	91	84.2667	-2.43333	5.84444
IEF	2007	PHY	84.4	60.5	82	94.4	78.9667	-5.43333	12.3111
IEF	2007	PHY	78.5	85.6	67.6	93.2	82.1333	3.63333	9.68889
IEF	2007	PHY	90	90.5	89.6	90	90.0333	0.03333	0.311111
IEF	2007	PHY	85.6	83.5	81.9	88.5	84.6333	-0.96667	2.57778
IEF	2007	PHY	85	91.5	80.1	92.4	88	3	5.26667
IEF	2007	PHY	87.4	82	90.7	89.5	87.4	0	3.6
IEF	2007	PHY	90.3	88	83.4	93.9	88.4333	-1.86667	3.64444
IEF	2007	PHY	89.5	91.7	81.9	90.9	88.1667	-1.33334	4.17778
IEF	2007	PHY	91.3	89.6	89.6	94.4	91.2	-0.1	2.13333
IEF	2007	PHY	78.2	57.5	80.3	93.3	77.0333	-1.16667	13.0222
IEF	2007	PHY	90.5	94.4	85.8	94.3	91.5	1	3.8
IEF	2007	PHY	84.9	87	82.2	84.9	84.7	-0.2	1.66667
IEF	2007	PHY	87	85.6	94	79.9	86.5	-0.5	5
IEF	2007	PHY	83.4	79.1	84.9	89.3	84.4333	1.03333	3.55556
IEF	2007	PHY	91.1	94.9	87.7	92.5	91.7	0.6	2.66667
IEF	2007	PHY	79.7	68.7	65.5	91.4	75.2	-4.5	10.8
IEF	2007	PHY	86.6	86	85.5	91.4	87.6333	1.03333	2.51111
IEF	2007	PHY	89.4	84.6	88.4	95	89.3333	-0.066664	3.77778
IEF	2007	PHY	91.7	85.5	93.3	95	91.2667	-0.43333	3.84444
IEF	2007	PHY	90.6	84.5	92	96	90.8333	0.233336	4.22222
IEF	2007	PHY	90.4	88.3	93.5	87.5	89.7667	-0.63333	2.48889
IEF	2007	PHY	82.4	78.8	80.6	89.9	83.1	0.7	4.53333
IEF	2007	PHY	92.4	91.2	92.4	93	92.2	-0.2	0.666667
IEF	2007	PHY	94.1	98.6	89	93.7	93.7667	-0.33333	3.22222
IEF	2007	PHY	87.8	80.2	85.5	92.2	85.9667	-1.83333	4.15556
IEF	2007	PHY	86.8	82.2	85.5	95.5	87.7333	0.93333	5.17778
IEF	2007	PHY	96	95.8	87.1	95.4	92.7667	-3.23333	3.77778
IEF	2007	PHY	87.8	90.2	77.9	95.2	87.7667	-0.03333	6.57778
IEF	2007	PHY	90.1	90.5	82.3	96.4	89.7333	-0.36667	4.95556
IEF	2007	PHY	86.1	85.5	81.6	92.8	86.6333	0.53333	4.11111
IEF	2007	PHY	86.4	85.7	81.9	95.5	87.7	1.3	5.2
IEF	2007	PHY	93	86.3	95.7	97.2	93.0667	0.066666	4.51111
IEF	2007	PHY	95.4	94.4	90.5	100	94.9667	-0.43333	3.35556
IEF	2007	PHY	81.4	65.5	83.1	97.7	82.1	0.7	11.0667
IAPP	2008	CHE	80.9	79.5	81.4	79.1	80	-0.9	0.933333
IAPP	2008	CHE	82.3	83.8	80.3	80.6	81.5667	-0.733334	1.48889
IAPP	2008	CHE	78	82.6	74.6	81.6	79.6	1.6	3.33333
IAPP	2008	CHE	58.2	56.5	64.6	55	58.7	0.5	3.93333
IAPP	2008	CHE	85.3	86.2	77.3	87.5	83.6667	-1.63334	4.24444
IAPP	2008	CHE	83.2	75.6	84.8	85.6	82	-1.2	4.26667
IAPP	2008	CHE	73.7	77.2	79.3	68.1	74.8667	1.16667	4.51111
IAPP	2008	CHE	65.2	61.5	70.4	74	68.6333	3.43333	4.75556
IAPP	2008	CHE	52.1	53.5	43.5	59	52	-0.1	5.66667
IAPP	2008	CHE	78	74.4	72	89.3	78.5667	0.566666	7.15556
IAPP	2008	ECOSOC	89	85.3	86.3	92.7	88.1	-0.9	3.06667
IAPP	2008	ECOSOC	35.1	43.3	27	34.5	34.9333	-0.166666	5.57778
IAPP	2008	ECOSOC	81	88.2	74.5	86.3	83	2	5.66667
IAPP	2008	ECOSOC	66	58.5	71	72.7	67.4	1.4	5.93333
IAPP	2008	ECOSOC	79.7	70.7	89.6	82.2	80.8333	1.13334	6.75556
IAPP	2008	ECOSOC	65.6	75.8	54	72	67.2667	1.66667	8.84444
IAPP	2008	ECOSOC	81.4	67	91.6	83.5	80.7	-0.7	9.13333
IAPP	2008	ECOSOC	70.5	54	72.5	77.1	67.8667	-2.63333	9.24444
IAPP	2008	ECOSOC	9.5	27	0	9.5	12.1667	2.66667	9.88889
IAPP	2008	ECOSOC	61.3	84.3	48.3	66.5	66.3667	5.06667	12.0444
IAPP	2008	ECOSOC	75.2	90.4	54.3	71.8	72.1667	-3.03334	12.1556
IAPP	2008	ECOSOC	72.6	86	52.6	79.8	72.8	0.2	13.4667
IAPP	2008	ECOSOC	81.5	86	45.7	93.7	75.1333	-6.36667	19.6222
IAPP	2008	ENG	66.9	66.7	65.7	68	66.8	-0.1	0.8
IAPP	2008	ENG	74.1	77	73.7	73.5	74.7333	0.63333	1.51111
IAPP	2008	ENG	52.5	52	51.7	57	53.5667	1.06667	2.28889
IAPP	2008	ENG	85.5	84	91	87.7	87.5667	2.06667	2.37778
IAPP	2008	ENG	71.4	75.2	69.2	74.1	72.8333	1.43334	2.42222
IAPP	2008	ENG	67	70.4	64.5	65.1	66.6667	-0.333336	2.48889
IAPP	2008	ENG	92.5	93.2	96.3	88.3	92.6	0.1	2.86667
IAPP	2008	ENG	55.5	57.5	63.8	56.6	59.3	3.8	3
IAPP	2008	ENG	72.9	74.3	80.2	72.3	75.6	2.7	3.06667
IAPP	2008	ENG	68.4	71.2	73.2	80.2	74.8667	6.46667	3.55556
IAPP	2008	ENG	86.1	84	91.1	82	85.7	-0.4	3.6
IAPP	2008	ENG	78.3	83.3	75	75.2	77.8333	-0.466664	3.64444
IAPP	2008	ENG	77	72.4	83.1	75.6	77.0333	0.03333	4.04444
IAPP	2008	ENG	78.4	73.5	86.5	80.3	80.1	1.7	4.4
IAPP	2008	ENG	51.5	51	57	64.1	57.3667	5.86667	4.48889
IAPP	2008	ENG	56.5	50	54.3	62.3	55.5333	-0.966667	4.51111
IAPP	2008	ENG	75.9	70.3	79.4	82.3	77.3333	1.43334	4.68889
IAPP	2008	ENG	58.6	61.8	54.1	69.5	61.8	3.2	5.13333
IAPP	2008	ENG	67.3	68.5	76.3	60.6	68.4667	1.16667	5.24444
IAPP	2008	ENG	77	70	84.4	73.7	76.0333	-0.96667	5.57778
IAPP	2008	ENG	52.4	58.8	58.7	46.1	54.5333	2.13333	5.62222
IAPP	2008	ENG	71	65	76.6	79.5	73.7	2.7	5.8
IAPP	2008	ENG	70.1	61	75.1	76.9	71	0.9	6.66667
IAPP	2008	ENG	90	91.8	93.5	76.7	87.3333	-2.66666	7.08889
IAPP	2008	ENG	26.5	15.5	27	37	26.5	0	7.33333
IAPP	2008	ENG	65.1	64	78.7	59	67.2333	2.13333	7.64444
IAPP	2008	ENG	71.2	81	78.3	61.7	73.6667	2.46666	7.97778
IAPP	2008	ENG	71.2	64	84.8	69.3	72.7	1.5	8.06667
IAPP	2008	ENG	82.1	75.3	95.2	77.7	82.7333	0.63333	8.31111
IAPP	2008	ENG	79.9	83.5	65.2	85.3	78	-1.9	8.53333
IAPP	2008	ENG	68.9	85.1	64.4	66.6	72.0333	3.13333	8.71111
IAPP	2008	ENG	38	53.9	28	39.8	40.5667	2.56667	8.88889
IAPP	2008	ENG	53.2	39	62.9	56.1	52.6667	-0.533332	9.11111
IAPP	2008	ENG	75.5	72.8	67.5	91	77.1	1.6	9.26667
IAPP	2008	ENG	68.6	78.7	56.3	76.5	70.5	1.9	9.46667
IAPP	2008	ENG	80.7	90.3	84.6	66	80.3	-0.4	9.53333
IAPP	2008	ENG	75.7	61.4	85.2	80.9	75.8333	0.133336	9.62222
IAPP	2008	ENG	84.5	100	72	84.5	85.5	1	9.66667
IAPP	2008	ENG	61.2	58	81.5	60	66.5	5.3	10
IAPP	2008	ENG	83.5	91.5	83.8	65	80.1	-3.4	10.0667
IAPP	2008	ENG	71	91	72	63.8	75.6	4.6	10.2667
IAPP	2008	ENG	55.6	58.7	59.5	36	51.4	-4.2	10.2667
IAPP	2008	ENG	66.9	45.7	76.1	60	60.6	-6.3	10.3333
IAPP	2008	ENG	78.4	89.4	60	77.8	75.7333	-2.66667	10.4889
IAPP	2008	ENG	75.8	64.5	72.9	93.1	76.8333	1.03334	10.8444
IAPP	2008	ENG	56.2	43	65.2	70	59.4	3.2	10.9333
IAPP	2008	ENG	75.7	55.5	80	80.9	72.1333	-3.56667	11.0889
IAPP	2008	ENG	49.5	58	32.2	57.5	49.2333	-0.266666	11.3556
IAPP	2008	ENG	79.3	57.8	93.5	76	75.7667	-3.53333	11.9778
IAPP	2008	ENG	53.5	36	73.5	54	54.5	1	12.6667
IAPP	2008	ENG	56.9	42.2	50.5	75	55.9	-1	12.7333
IAPP	2008	ENG	51.3	29.7	62.5	55.8	49.3333	-1.96667	13.0889
IAPP	2008	ENG	66.8	54	59.2	88.7	67.3	0.5	14.2667
IAPP	2008	ENG	80.6	89.5	83.7	54	75.7333	-4.86667	14.4889
IAPP	2008	ENG	67.6	86	49.7	79.6	71.7667	4.16667	14.7111
IAPP	2008	ENG	57.1	63.7	27.5	59.4	50.2	-6.9	15.1333
IAPP	2008	ENG	64	98.8	58	48.5	68.4333	4.43333	20.2444
IAPP	2008	ENV	58.3	58.1	64.2	58	60.1	1.8	2.73333
IAPP	2008	ENV	79	84.9	79.7	75.2	79.9333	0.933334	3.31111
IAPP	2008	ENV	76.5	71.4	82.6	79	77.6667	1.16666	4.17778
IAPP	2008	ENV	83.8	81.5	78.3	89.4	83.0667	-0.733334	4.22222
IAPP	2008	ENV	86.2	80.6	86.4	93	86.6667	0.466664	4.22222
IAPP	2008	ENV	53.3	57	63	50	56.6667	3.36667	4.44444
IAPP	2008	ENV	82.5	92.5	81.2	90.2	87.9667	5.46667	4.51111
IAPP	2008	ENV	84.4	85.8	79.2	70	78.3333	-6.06666	5.55556
IAPP	2008	ENV	80.7	88.9	81.5	70.8	80.4	-0.3	6.4
IAPP	2008	ENV	57	57.5	57.8	74.1	63.1333	6.13333	7.31111
IAPP	2008	ENV	62.5	65.9	69.5	51	62.1333	-0.366665	7.42222
IAPP	2008	ENV	76.7	60.2	73.5	82	71.9	-4.8	7.8
IAPP	2008	ENV	61	65	73	49.3	62.4333	1.43333	8.75556
IAPP	2008	ENV	59.6	61.4	49.6	77.3	62.7667	3.16667	9.68889
IAPP	2008	ENV	64.1	58.7	84.9	66.8	70.1333	6.03333	9.84444
IAPP	2008	ENV	53.3	60.5	39	63.5	54.3333	1.03333	10.2222
IAPP	2008	ENV	23	46	20	17.7	27.9	4.9	12.0667
IAPP	2008	ENV	74	90.9	54.5	90.6	78.6667	4.66666	16.1111
IAPP	2008	ENV	64.2	51.3	90	46.5	62.6	-1.6	18.2667
IAPP	2008	LIF	80.5	77.6	81.8	86.6	82	1.5	3.06667
IAPP	2008	LIF	81.8	78.1	86.6	80.8	81.8333	0.033336	3.17778
IAPP	2008	LIF	69.5	68.5	77.7	72.5	72.9	3.4	3.2
IAPP	2008	LIF	77.8	75.5	83.7	77.5	78.9	1.1	3.2
IAPP	2008	LIF	75.8	78.5	70.5	78.8	75.9333	0.133334	3.62222
IAPP	2008	LIF	90.3	94.8	84.6	88.3	89.2333	-1.06667	3.71111
IAPP	2008	LIF	87.6	83.3	94.2	87.2	88.2333	0.63333	3.97778
IAPP	2008	LIF	75.9	81.1	79.3	70	76.8	0.9	4.53333
IAPP	2008	LIF	92.2	83.7	95.8	93.1	90.8667	-1.33333	4.77778
IAPP	2008	LIF	76.7	77.6	76	87.7	80.4333	3.73333	4.84444
IAPP	2008	LIF	89.5	83.8	96.6	86.5	88.9667	-0.53333	5.08889
IAPP	2008	LIF	83.4	91.3	89.7	78.8	86.6	3.2	5.2
IAPP	2008	LIF	81.8	74.7	85.5	88	82.7333	0.93333	5.35556
IAPP	2008	LIF	82.9	77.8	82.3	92.6	84.2333	1.33333	5.57778
IAPP	2008	LIF	88.9	86.3	96.3	80.8	87.8	-1.1	5.66667
IAPP	2008	LIF	76.6	72.9	86.3	73.3	77.5	0.9	5.86667
IAPP	2008	LIF	87	77.9	88.5	95.9	87.4333	0.433334	6.35556
IAPP	2008	LIF	84.3	86.6	92.1	73.5	84.0667	-0.233334	7.04444
IAPP	2008	LIF	55.4	70.6	58.4	50	59.6667	4.26667	7.28889
IAPP	2008	LIF	65.9	77.7	57.2	63.1	66	0.1	7.8
IAPP	2008	LIF	86.5	100	87.6	76.4	88	1.5	8
IAPP	2008	LIF	76.5	88.8	81.3	66.4	78.8333	2.33334	8.28889
IAPP	2008	LIF	82.1	74.2	79.4	96.2	83.2667	1.16667	8.62222
IAPP	2008	LIF	81.5	91.1	75.5	65.6	77.4	-4.1	9.13333
IAPP	2008	LIF	80.6	83.3	89.4	62.8	78.5	-2.1	10.4667
IAPP	2008	LIF	70	93	75.2	61.8	76.6667	6.66666	10.8889
IAPP	2008	LIF	80.4	67.4	99.5	80.8	82.5667	2.16667	11.2889
IAPP	2008	LIF	90	96.5	70.9	96.8	88.0667	-1.93333	11.4444
IAPP	2008	LIF	76	54.9	79.4	82.2	72.1667	-3.83334	11.5111
IAPP	2008	LIF	58	78.8	58	44.8	60.5333	2.53333	12.1778
IAPP	2008	LIF	79.5	89.5	60	88.5	79.3333	-0.166664	12.8889
IAPP	2008	LIF	35.3	59	14.1	44	39.0333	3.73333	16.6222
IAPP	2008	LIF	34.8	74.4	29.5	42	48.6333	13.8333	17.1778
IAPP	2008	LIF	47.5	30.5	75.3	67.8	57.8667	10.3667	18.2444
IAPP	2008	MAT	85.4	86.1	80.4	90.2	85.5667	0.166666	3.44444
IAPP	2008	MAT	75.5	81.7	71.2	84.5	79.1333	3.63333	5.28889
IAPP	2008	PHY	77.4	78	74.5	78.4	76.9667	-0.43333	1.64444
IAPP	2008	PHY	82.2	76.7	83.5	85.8	82	-0.2	3.53333
IAPP	2008	PHY	85.1	81.7	76.3	88	82	-3.1	4
IAPP	2008	PHY	83.3	78.5	79.8	90	82.7667	-0.53333	4.82222
IAPP	2008	PHY	81	76.2	84.3	66.3	75.6	-5.4	6.2
IAPP	2008	PHY	88.1	73.7	95.8	87.8	85.7667	-2.33333	8.04444
IEF	2008	CHE	77.9	82.1	74.9	60.5	72.5	-5.4	8
IEF	2008	CHE	69.3	72.5	89.4	50	70.6333	1.33333	13.7556
IEF	2008	CHE	68.2	75.1	74.8	56.5	68.8	0.6	8.2
IEF	2008	CHE	60.3	69.5	65.5	47.5	60.8333	0.533332	8.88889
IEF	2008	CHE	67.2	90	67.5	63.1	73.5333	6.33333	10.9778
IEF	2008	CHE	72.7	85.4	72.2	53.9	70.5	-2.2	11.0667
IEF	2008	CHE	64.1	85	51.2	67.1	67.7667	3.66667	11.4889
IEF	2008	CHE	56	63	53.2	51.5	55.9	-0.1	4.73333
IEF	2008	CHE	72.4	82.1	85.4	54.5	74	1.6	13
IEF	2008	CHE	59.8	70	61.9	51	60.9667	1.16667	6.64444
IEF	2008	CHE	63.6	65.9	60.1	61.5	62.5	-1.1	2.26667
IEF	2008	CHE	82.6	87.1	89.4	68.5	81.6667	-0.933336	8.77778
IEF	2008	CHE	82.8	90	74	62.1	75.3667	-7.43333	9.75556
IEF	2008	CHE	73.4	78.7	78.6	64.8	74.0333	0.63333	6.15556
IEF	2008	CHE	59.6	45.1	64.9	67.9	59.3	-0.3	9.46667
IEF	2008	CHE	69.1	78.6	47.5	68.2	64.7667	-4.33333	11.5111
IEF	2008	CHE	78.7	80.5	74.1	79.6	78.0667	-0.633334	2.64444
IEF	2008	CHE	72.9	66.6	90.4	62	73	0.1	11.6
IEF	2008	CHE	63.9	66.2	68	59	64.4	0.5	3.6
IEF	2008	CHE	72.9	78.3	78.7	51.4	69.4667	-3.43333	12.0444
IEF	2008	CHE	74.5	80	43.5	71.5	65	-9.5	14.3333
IEF	2008	CHE	77.2	80.2	84.6	72.8	79.2	2	4.26667
IEF	2008	CHE	74.6	72.9	82.6	68.1	74.5333	-0.06667	5.37778
IEF	2008	CHE	78.5	86.5	79.6	67.5	77.8667	-0.63333	6.91111
IEF	2008	CHE	84.1	77.7	84.9	86.4	83	-1.1	3.53333
IEF	2008	CHE	79.7	88	93.5	67.1	82.8667	3.16667	10.5111
IEF	2008	CHE	76	75.5	73.9	73.7	74.3667	-1.63333	0.755556
IEF	2008	CHE	82.4	97.9	71.5	74.5	81.3	-1.1	11.0667
IEF	2008	CHE	79.8	84.7	83.6	72.3	80.2	0.4	5.26667
IEF	2008	CHE	89.8	93.9	88.6	73.1	85.2	-4.6	8.06667
IEF	2008	CHE	83.3	81.8	81.7	77.2	80.2333	-3.06667	2.02222
IEF	2008	CHE	78.4	84.1	75.2	74.2	77.8333	-0.566664	4.17778
IEF	2008	CHE	77.5	70.5	91.7	66.5	76.2333	-1.26667	10.3111
IEF	2008	CHE	80.5	78.6	79.3	78.1	78.6667	-1.83334	0.422222
IEF	2008	CHE	71.9	75.3	83.7	65	74.6667	2.76666	6.44444
IEF	2008	CHE	72.1	77.9	73.7	65.5	72.3667	0.26667	4.57778
IEF	2008	CHE	83.7	85.3	91.5	73	83.2667	-0.43333	6.84444
IEF	2008	CHE	70	51	74	66	63.6667	-6.33333	8.44444
IEF	2008	CHE	78.4	89.5	75.2	72.2	78.9667	0.56667	7.02222
IEF	2008	CHE	81.2	85.5	90.6	68.2	81.4333	0.233334	8.82222
IEF	2008	CHE	91	95.9	86	72.8	84.9	-6.1	8.06667
IEF	2008	CHE	79.4	85	68.5	76.7	76.7333	-2.66667	5.51111
IEF	2008	CHE	88.1	95.5	91	75.3	87.2667	-0.83333	7.97778
IEF	2008	CHE	85.6	88.7	87.8	75.2	83.9	-1.7	5.8
IEF	2008	CHE	87.2	99.1	94.6	79.7	91.1333	3.93333	7.62222
IEF	2008	CHE	77.6	82.2	70.2	81.3	77.9	0.3	5.13333
IEF	2008	CHE	84.4	84.8	86.1	82.1	84.3333	-0.066664	1.48889
IEF	2008	CHE	68.1	58.2	77	74.6	69.9333	1.83333	7.82222
IEF	2008	CHE	75.3	67.5	81	79.4	75.9667	0.66667	5.64444
IEF	2008	CHE	85.3	86.2	90.4	77.1	84.5667	-0.733334	4.97778
IEF	2008	CHE	88.6	87.1	92.5	76.6	85.4	-3.2	5.86667
IEF	2008	CHE	75.7	65.3	78.6	84.3	76.0667	0.366666	7.17778
IEF	2008	CHE	77.8	94.6	67	82.6	81.4	3.6	9.6
IEF	2008	CHE	77.7	85.6	78.5	63.9	76	-1.7	8.06667
IEF	2008	CHE	58.5	51	54.1	71.7	58.9333	0.433334	8.51111
IEF	2008	CHE	77.7	79.5	79.1	74.4	77.6667	-0.033336	2.17778
IEF	2008	CHE	79.1	83.8	75	73.6	77.4667	-1.63333	4.22222
IEF	2008	CHE	77.1	68.1	81	77.5	75.5333	-1.56667	4.95556
IEF	2008	CHE	81	87.3	80	77.5	81.6	0.6	3.8
IEF	2008	CHE	79.5	76.6	79.6	81.9	79.3667	-0.13333	1.84444
IEF	2008	CHE	80.7	84.3	78.3	76.6	79.7333	-0.96667	3.04444
IEF	2008	CHE	91.3	91.9	92.1	82.4	88.8	-2.5	4.26667
IEF	2008	CHE	84.9	93.9	85	80	86.3	1.4	5.06667
IEF	2008	CHE	81.9	88.1	86.9	69.1	81.3667	-0.53333	8.17778
IEF	2008	CHE	80.6	88.5	80.2	77.3	82	1.4	4.33333
IEF	2008	CHE	81.3	78.5	92.1	73.2	81.2667	-0.03333	7.22222
IEF	2008	CHE	84.7	92.9	81.1	78	84	-0.7	5.93333
IEF	2008	CHE	75	80.8	53	75.7	69.8333	-5.16666	11.2222
IEF	2008	CHE	85.2	85.3	87.1	82.2	84.8667	-0.33333	1.77778
IEF	2008	CHE	87.8	87.6	92.4	82.9	87.6333	-0.16667	3.17778
[truncated: 73,625 more rows]
